# Supplementary material
Source: publisher figshare collection journal article supplement (https://acs.figshare.com/ndownloader/files/8025011)
Supplement: Supplementary file 1 [file 8025011]

## Sheet: Description
Supplemental Table 4. Data summary for S-sulfenylated peptides and proteins identified in RKO cells using PYD probe. The spectral information for all the identified peptides, such as precursor mass, mass accuracy, and scan number corresponding to each RAW file, is included.

## Sheet: Analysis View
Name	Software	Value
TagRecon 1.4.47	TagRecon 1.4.47
MS-GF+ Beta (v9517)	MS-GF+ Beta (v9517)

## Sheet: Modification View
Delta Mass	Total	C	M
Total	2081	921	1160
320.1485 ; (0 Unimod matches)	230	230
57.0215 ; Carbamidomethyl ; Ala->Gln ; Gly->Asn ; Gly	451	451
57.0214 ; Carbamidomethyl ; Ala->Gln ; Gly->Asn ; Gly	240	240
15.9949 ; Oxidation ; Ala->Ser ; Phe->Tyr	1160		1160

## Sheet: Spectrum View
Group/Source/Spectrum	Distinct Peptides	Distinct Matches	Filtered Spectra	Distinct Analyses	Distinct Charges	Protein Groups	Scan Time	Precursor m/z	Observed Mass	Exact Mass	Mass Error	Analysis	Charge	Q Value	Sequence
	103	130	230	2	3	112
20150427	103	130	230	2	3	112
JY_PYD_vitro_Sulfenylome_20150427_BR1	82	98	113	2	3	94
0.1.9295							0	684.993	2051.96	2051.95	0.00945199	TagRecon 1.4.47	3	0.00148673	ATC[320]APQHGAPGPGPADASK
0.1.9582							0	449.558	1345.65	1345.64	0.00792834	TagRecon 1.4.47	3	0.00323765	RC[320]QYVTEK
0.1.9601							0	474.926	1421.75	1421.74	0.009765	TagRecon 1.4.47	3	0.00306947	TVAKC[320]QVTPR
0.1.9650							0	525.248	1572.72	1572.72	0.00588367	TagRecon 1.4.47	3	0.00327181	KC[320]YEM[16]ASHLR
0.1.10045							0	419.211	1254.61	1254.6	0.00745749	TagRecon 1.4.47	3	0.00326572	DRC[320]TLAEK
0.1.10933							0	685.324	2052.95	2052.93	0.018899	TagRecon 1.4.47	3	0.00230006	HELQANC[320]YEEVKDR
0.1.12162							0	504.588	1510.74	1510.74	0.00837282	TagRecon 1.4.47	3	0.00287299	FAC[320]HSASLTVR
0.1.12399							0	590.959	1769.86	1769.84	0.0116407	TagRecon 1.4.47	3	0.00506644	LTDC[320]VVM[16]RDPASK
0.1.12474							0	576.943	1727.81	1727.79	0.0128557	TagRecon 1.4.47	3	0.00288125	SYC[320]AEIAHNVSSK
0.1.12868							0	677.001	2027.98	2027.97	0.0154498	TagRecon 1.4.47	3	0.00203476	LM[16]DQNLKC[320]LSAAEEK
0.1.12893							0	832.415	2494.22	2494.2	0.0194869	TagRecon 1.4.47	3	0.000974043	ESGSLSPEHGPVVVHC[320]SAGIGR
0.1.12894							0	696.025	2085.05	2085.04	0.0119731	TagRecon 1.4.47	3	0.00261044	EIVHLQAGQC[320]GNQIGAK
0.1.12905							0	1015	2027.98	2027.97	0.0128192	TagRecon 1.4.47	2	0.00146641	LM[16]DQNLKC[320]LSAAEEK
0.1.12924							0	922.091	2763.25	2763.24	0.0139845	TagRecon 1.4.47	3	0.00228022	KAAAPAPEEEM[16]DEC[320]EQALAAEPK
0.1.12993							0	624.564	2494.23	2494.2	0.0264184	TagRecon 1.4.47	4	0.0190549	ESGSLSPEHGPVVVHC[320]SAGIGR
0.1.12997							0	832.414	2494.22	2494.2	0.0164724	TagRecon 1.4.47	3	0.000906505	ESGSLSPEHGPVVVHC[320]SAGIGR
0.1.12998							0	696.028	2085.06	2085.04	0.0190243	TagRecon 1.4.47	3	0.00267697	EIVHLQAGQC[320]GNQIGAK
0.1.13533							0	702	2102.98	2102.95	0.0273285	TagRecon 1.4.47	3	0.00301191	KM[16]EDSVGC[320]LETAEEVK
0.1.13585							0	498.584	1492.73	1492.71	0.0166053	TagRecon 1.4.47	3	0.0128897	AHVVPC[320]FDASK
0.1.13935							0	704.351	2110.03	2110.02	0.0137793	TagRecon 1.4.47	3	0.0022594	NPPELIGVHC[320]THGFNR
0.1.13953							0	787.396	1572.78	1572.77	0.00470959	TagRecon 1.4.47	2	0.0020237	FIC[320]TTSAIQNR
0.1.14118							0	578.643	1732.91	1732.89	0.01483	TagRecon 1.4.47	3	0.00325179	IVLVDDREC[320]PVR
0.1.14149							0	666.629	1996.87	1996.85	0.0186041	TagRecon 1.4.47	3	0.00303802	C[57]C[57]LTYC[320]FNKPEDK
0.1.14256							0	623.966	1868.88	1868.86	0.0146093	TagRecon 1.4.47	3	0.00324924	FIC[320]EQDHQNFLR
0.1.14286							0	671.669	2011.98	2011.97	0.013858	TagRecon 1.4.47	3	0.00268751	LMDQNLKC[320]LSAAEEK
0.1.14312							0	623.313	1866.92	1866.9	0.0129679	TagRecon 1.4.47	3	0.00227494	KC[320]SLPAEEDSVLEK
0.1.14513							0	788.053	2361.14	2361.12	0.0152708	TagRecon 1.4.47	3	0.00206222	QESIM[16]DAGPVVVHC[320]SAGIGR
0.1.14698							0	619.954	1856.84	1856.83	0.0113967	TagRecon 1.4.47	3	0.00224003	NC[320]LTNFHGM[16]DLTR
0.1.14757							0	615.641	1843.9	1843.89	0.00940864	TagRecon 1.4.47	3	0.00303836	KVFANPEDC[320]VAFGK
0.1.14817							0	693.856	1385.7	1385.69	0.0117703	TagRecon 1.4.47	2	0.00196694	STLTDSLVC[320]K
0.1.14826							0	634.323	1266.63	1266.62	0.0142153	TagRecon 1.4.47	2	0.0163826	VWNLANC[320]K
0.1.14874							0	446.253	1335.74	1335.72	0.0140402	TagRecon 1.4.47	3	0.00307697	KC[320]DLISIPK
0.1.14936							0	541.617	1621.83	1621.82	0.0057472	TagRecon 1.4.47	3	0.00314975	NTGIIC[320]TIGPASR
0.1.14960							0	811.927	1621.84	1621.82	0.0139572	TagRecon 1.4.47	2	0.0015984	NTGIIC[320]TIGPASR
0.1.14974							0	446.253	1335.74	1335.72	0.0147175	TagRecon 1.4.47	3	0.00304624	KC[320]DLISIPK
0.1.14992							0	429.892	1286.65	1286.64	0.0100761	TagRecon 1.4.47	3	0.0161133	TYAIC[320]GAIR
0.1.15011							0	564.953	1691.84	1691.82	0.0162309	TagRecon 1.4.47	3	0.00250648	GEAVGVHC[320]ALGFGR
0.1.15088							0	787.156	3144.59	3144.57	0.0282157	TagRecon 1.4.47	4	0.0181063	LVAEVEESPETAAHPGPIVVHC[320]SAGIGR
0.1.15115							0	1049.2	3144.58	3144.57	0.0140953	TagRecon 1.4.47	3	0.000902171	LVAEVEESPETAAHPGPIVVHC[320]SAGIGR
0.1.15342							0	555.942	1664.8	1664.79	0.0161613	TagRecon 1.4.47	3	0.00301567	YNPTWHC[320]IVGR
0.1.15402							0	981.81	2942.41	2942.38	0.024062	TagRecon 1.4.47	3	0.00213986	ERPTPSLNNNC[320]TTSEDSLVLYNR
0.1.15507							0	632.993	1895.96	1895.94	0.014659	TagRecon 1.4.47	3	0.00297592	VNQIGSVTESLQAC[320]K
0.1.15591							0	699.692	2096.05	2096.04	0.0153308	TagRecon 1.4.47	3	0.00248913	IISNASC[320]TTNC[57]LAPLAK
0.1.15609							0	1049.03	2096.05	2096.04	0.0147563	TagRecon 1.4.47	2	0.00101652	IISNASC[320]TTNC[57]LAPLAK
0.1.15685							0	699.691	2096.05	2096.04	0.0128403	TagRecon 1.4.47	3	0.00257735	IISNASC[320]TTNC[57]LAPLAK
0.1.15704							0	1049.03	2096.05	2096.04	0.00899871	TagRecon 1.4.47	2	0.00115021	IISNASC[320]TTNC[57]LAPLAK
0.1.15794							0	699.693	2096.06	2096.04	0.0191765	TagRecon 1.4.47	3	0.00252095	IISNASC[320]TTNC[57]LAPLAK
0.1.15905							0	699.693	2096.06	2096.04	0.0184018	TagRecon 1.4.47	3	0.00274227	IISNASC[320]TTNC[57]LAPLAK
0.1.16804							0	797.388	1592.76	1592.75	0.00643737	TagRecon 1.4.47	2	0.00167243	DVIEEYFKC[320]K
0.1.16851							0	1016.47	2030.93	2030.92	0.00661998	TagRecon 1.4.47	2	0.00134269	LEDEHLVFFC[320]QM[16]GK
0.1.16944							0	897.473	1792.93	1792.91	0.0163176	TagRecon 1.4.47	2	0.00107133	VPTANVSVVDLTC[320]R
0.1.17426							0	786.075	2355.2	2355.19	0.012489	TagRecon 1.4.47	3	0.00278549	VQEKC[320]QLEINFNTLQTK
0.1.17825							0	808.955	1615.9	1615.89	0.00816342	TagRecon 1.4.47	2	0.00154186	LVILANNC[320]PALR
0.1.17838							0	539.64	1615.9	1615.89	0.0116339	TagRecon 1.4.47	3	0.00292311	LVILANNC[320]PALR
0.1.17897							0	656.668	1966.98	1966.97	0.0103976	TagRecon 1.4.47	3	0.00226818	AC[320]QSIYPLHDVFVR
0.1.18250							0	1097.51	3289.52	3289.51	0.012449	TagRecon 1.4.47	3	0.00151338	SGDAAIVDM[16]VPGKPM[16]C[320]VESFSDYPPLGR
0.1.18342							0	842.759	2525.25	2525.24	0.0176569	TagRecon 1.4.47	3	0.00242903	GPAVGIDLGTTYSC[320]VGVFQHGK
0.1.18396							0	654.364	1306.71	1306.71	0.00764192	TagRecon 1.4.47	2	0.0129474	LLC[320]GLLAER
0.1.19021							0	691.043	2070.11	2070.09	0.014604	TagRecon 1.4.47	3	0.002046	VAHALAEGLGVIAC[320]IGEK
0.1.19087							0	726.696	2177.07	2177.05	0.0191328	TagRecon 1.4.47	3	0.00247512	GQKC[320]EFQDAYVLLSEK
0.1.19439							0	606.662	1816.96	1816.95	0.0127967	TagRecon 1.4.47	3	0.00248271	SLHDALC[320]VLAQTVK
0.1.19440							0	909.491	1816.97	1816.95	0.0160432	TagRecon 1.4.47	2	0.00132675	SLHDALC[320]VLAQTVK
0.1.19666							0	650.021	1947.04	1947.02	0.0168792	TagRecon 1.4.47	3	0.00263453	AAVEEGIVLGGGC[320]ALLR
0.1.19693							0	974.525	1947.03	1947.02	0.00974965	TagRecon 1.4.47	2	0.00106077	AAVEEGIVLGGGC[320]ALLR
0.1.19762							0	650.018	1947.03	1947.02	0.00695984	TagRecon 1.4.47	3	0.00242636	AAVEEGIVLGGGC[320]ALLR
0.1.15088							0	787.156	3144.59	3144.57	0.0281522	MS-GF+ Beta (v9517)	4	2.753e-24	LVAEVEESPETAAHPGPIVVHC[320]SAGIGR
0.1.15115							0	1049.2	3144.58	3144.57	0.0139443	MS-GF+ Beta (v9517)	3	7.37054e-22	LVAEVEESPETAAHPGPIVVHC[320]SAGIGR
0.1.12993							0	624.564	2494.23	2494.2	0.0263568	MS-GF+ Beta (v9517)	4	5.0925e-20	ESGSLSPEHGPVVVHC[320]SAGIGR
0.1.12997							0	832.414	2494.22	2494.2	0.0165434	MS-GF+ Beta (v9517)	3	4.43057e-19	ESGSLSPEHGPVVVHC[320]SAGIGR
0.1.18253							0	823.389	3289.53	3289.51	0.0159221	MS-GF+ Beta (v9517)	4	1.44167e-17	SGDAAIVDM[16]VPGKPM[16]C[320]VESFSDYPPLGR
0.1.12893							0	832.415	2494.22	2494.2	0.0194731	MS-GF+ Beta (v9517)	3	2.12597e-17	ESGSLSPEHGPVVVHC[320]SAGIGR
0.1.12885							0	624.562	2494.22	2494.2	0.0175677	MS-GF+ Beta (v9517)	4	4.44863e-17	ESGSLSPEHGPVVVHC[320]SAGIGR
0.1.18250							0	1097.51	3289.52	3289.51	0.0123343	MS-GF+ Beta (v9517)	3	4.65826e-17	SGDAAIVDM[16]VPGKPM[16]C[320]VESFSDYPPLGR
0.1.9295							0	684.993	2051.96	2051.95	0.0094789	MS-GF+ Beta (v9517)	3	3.71675e-15	ATC[320]APQHGAPGPGPADASK
0.1.14513							0	788.053	2361.14	2361.12	0.0152303	MS-GF+ Beta (v9517)	3	4.57472e-15	QESIM[16]DAGPVVVHC[320]SAGIGR
0.1.15609							0	1049.03	2096.05	2096.04	0.0148045	MS-GF+ Beta (v9517)	2	2.97263e-14	IISNASC[320]TTNC[57]LAPLAK
0.1.14539							0	591.29	2361.13	2361.12	0.0107005	MS-GF+ Beta (v9517)	4	3.17699e-14	QESIM[16]DAGPVVVHC[320]SAGIGR
0.1.15685							0	699.691	2096.05	2096.04	0.012716	MS-GF+ Beta (v9517)	3	4.00671e-14	IISNASC[320]TTNC[57]LAPLAK
0.1.15704							0	1049.03	2096.05	2096.04	0.00894515	MS-GF+ Beta (v9517)	2	5.16451e-14	IISNASC[320]TTNC[57]LAPLAK
0.1.13935							0	704.351	2110.03	2110.02	0.0137564	MS-GF+ Beta (v9517)	3	7.53173e-14	NPPELIGVHC[320]THGFNR
0.1.13881							0	528.517	2110.04	2110.02	0.0210673	MS-GF+ Beta (v9517)	4	5.27008e-13	NPPELIGVHC[320]THGFNR
0.1.15794							0	699.693	2096.06	2096.04	0.0191247	MS-GF+ Beta (v9517)	3	1.05771e-12	IISNASC[320]TTNC[57]LAPLAK
0.1.22285							0	821.935	3283.71	3283.69	0.0237639	MS-GF+ Beta (v9517)	4	1.07998e-12	DGNASGTTLLEALDC[320]ILPPTRPTDKPLR
0.1.15905							0	699.693	2096.06	2096.04	0.0183923	MS-GF+ Beta (v9517)	3	5.03087e-12	IISNASC[320]TTNC[57]LAPLAK
0.1.18342							0	842.759	2525.25	2525.24	0.0175656	MS-GF+ Beta (v9517)	3	5.47349e-12	GPAVGIDLGTTYSC[320]VGVFQHGK
0.1.15591							0	699.692	2096.05	2096.04	0.0152795	MS-GF+ Beta (v9517)	3	1.04219e-11	IISNASC[320]TTNC[57]LAPLAK
0.1.12868							0	677.001	2027.98	2027.97	0.0154437	MS-GF+ Beta (v9517)	3	1.34746e-11	LM[16]DQNLKC[320]LSAAEEK
0.1.14698							0	619.954	1856.84	1856.83	0.0113759	MS-GF+ Beta (v9517)	3	3.5727e-11	NC[320]LTNFHGM[16]DLTR
0.1.14286							0	671.669	2011.98	2011.97	0.0138984	MS-GF+ Beta (v9517)	3	4.86547e-11	LMDQNLKC[320]LSAAEEK
0.1.15402							0	981.81	2942.41	2942.38	0.0239886	MS-GF+ Beta (v9517)	3	1.08289e-10	ERPTPSLNNNC[320]TTSEDSLVLYNR
0.1.14149							0	666.629	1996.87	1996.85	0.0185364	MS-GF+ Beta (v9517)	3	1.20237e-10	C[57]C[57]LTYC[320]FNKPEDK
0.1.15011							0	564.953	1691.84	1691.82	0.0161936	MS-GF+ Beta (v9517)	3	1.37658e-10	GEAVGVHC[320]ALGFGR
0.1.19693							0	974.525	1947.03	1947.02	0.00969294	MS-GF+ Beta (v9517)	2	1.62645e-10	AAVEEGIVLGGGC[320]ALLR
0.1.12924							0	922.091	2763.25	2763.24	0.014009	MS-GF+ Beta (v9517)	3	1.91074e-10	KAAAPAPEEEM[16]DEC[320]EQALAAEPK
0.1.15294							0	687.822	2747.26	2747.24	0.0178215	MS-GF+ Beta (v9517)	4	2.49275e-10	KAAAPAPEEEMDEC[320]EQALAAEPK
0.1.19762							0	650.018	1947.03	1947.02	0.00699411	MS-GF+ Beta (v9517)	3	3.38605e-10	AAVEEGIVLGGGC[320]ALLR
0.1.16944							0	897.473	1792.93	1792.91	0.0163021	MS-GF+ Beta (v9517)	2	5.87405e-10	VPTANVSVVDLTC[320]R
0.1.15342							0	555.942	1664.8	1664.79	0.0161786	MS-GF+ Beta (v9517)	3	2.36235e-09	YNPTWHC[320]IVGR
0.1.19021							0	691.043	2070.11	2070.09	0.014569	MS-GF+ Beta (v9517)	3	2.51695e-09	VAHALAEGLGVIAC[320]IGEK
0.1.17897							0	656.668	1966.98	1966.97	0.0104124	MS-GF+ Beta (v9517)	3	2.88554e-09	AC[320]QSIYPLHDVFVR
0.1.10933							0	685.324	2052.95	2052.93	0.0188105	MS-GF+ Beta (v9517)	3	2.90077e-09	HELQANC[320]YEEVKDR
0.1.14312							0	623.313	1866.92	1866.9	0.0130292	MS-GF+ Beta (v9517)	3	3.2332e-09	KC[320]SLPAEEDSVLEK
0.1.12905							0	1015	2027.98	2027.97	0.0128325	MS-GF+ Beta (v9517)	2	3.3439e-09	LM[16]DQNLKC[320]LSAAEEK
0.1.12894							0	696.025	2085.05	2085.04	0.0119239	MS-GF+ Beta (v9517)	3	3.61241e-09	EIVHIQAGQC[320]GNQIGAK
0.1.10943							0	514.245	2052.95	2052.93	0.0182479	MS-GF+ Beta (v9517)	4	3.99657e-09	HELQANC[320]YEEVKDR
0.1.13983							0	528.515	2110.03	2110.02	0.0137431	MS-GF+ Beta (v9517)	4	5.20806e-09	NPPELIGVHC[320]THGFNR
0.1.14256							0	623.966	1868.88	1868.86	0.0146161	MS-GF+ Beta (v9517)	3	6.12021e-09	FIC[320]EQDHQNFLR
0.1.12998							0	696.028	2085.06	2085.04	0.019065	MS-GF+ Beta (v9517)	3	1.05632e-08	EIVHIQAGQC[320]GNQIGAK
0.1.19440							0	909.491	1816.97	1816.95	0.0160494	MS-GF+ Beta (v9517)	2	4.3621e-08	SLHDALC[320]VLAQTVK
0.1.12162							0	504.588	1510.74	1510.74	0.00836369	MS-GF+ Beta (v9517)	3	7.69323e-08	FAC[320]HSASLTVR
0.1.17825							0	808.955	1615.89	1615.89	0.00811661	MS-GF+ Beta (v9517)	2	8.96919e-08	LVILANNC[320]PALR
0.1.17838							0	539.64	1615.9	1615.89	0.0117044	MS-GF+ Beta (v9517)	3	1.01731e-07	LVILANNC[320]PALR
0.1.19087							0	726.696	2177.07	2177.05	0.0190401	MS-GF+ Beta (v9517)	3	3.12753e-07	GQKC[320]EFQDAYVLLSEK
0.1.17426							0	786.075	2355.2	2355.19	0.0124168	MS-GF+ Beta (v9517)	3	3.37026e-07	VQEKC[320]QLEINFNTLQTK
0.1.19666							0	650.021	1947.04	1947.02	0.0168818	MS-GF+ Beta (v9517)	3	3.61973e-07	AAVEEGIVLGGGC[320]ALLR
0.1.9601							0	474.926	1421.75	1421.74	0.00972723	MS-GF+ Beta (v9517)	3	4.18687e-07	TVAKC[320]QVTPR
0.1.13953							0	787.396	1572.78	1572.77	0.00467859	MS-GF+ Beta (v9517)	2	4.2612e-07	FIC[320]TTSAIQNR
0.1.12474							0	576.943	1727.81	1727.79	0.0128369	MS-GF+ Beta (v9517)	3	6.89476e-07	SYC[320]AEIAHNVSSK
0.1.14757							0	615.641	1843.9	1843.89	0.00949327	MS-GF+ Beta (v9517)	3	7.58812e-07	KVFANPEDC[320]VAFGK
0.1.19439							0	606.662	1816.96	1816.95	0.0128013	MS-GF+ Beta (v9517)	3	1.67133e-06	SLHDALC[320]VLAQTVK
0.1.16804							0	797.388	1592.76	1592.75	0.00643499	MS-GF+ Beta (v9517)	2	3.61598e-06	DVIEEYFKC[320]K
0.1.16851							0	1016.47	2030.93	2030.92	0.00659748	MS-GF+ Beta (v9517)	2	9.33901e-06	LEDEHLVFFC[320]QM[16]GK
0.1.14817							0	693.856	1385.7	1385.69	0.0117386	MS-GF+ Beta (v9517)	2	1.1012e-05	STLTDSLVC[320]K
0.1.18757							0	704.833	1407.65	1407.64	0.00829022	MS-GF+ Beta (v9517)	2	1.49475e-05	M[16]C[320]LFAGFQR
0.1.15391							0	1049.53	2097.04	2096.04	1.00187	MS-GF+ Beta (v9517)	2	1.53396e-05	IISNASC[320]TTNC[57]LAPLAK
0.1.12341							0	670.004	2006.99	2006.97	0.0165215	MS-GF+ Beta (v9517)	3	2.8364e-05	KPNVGC[320]QQDSEELLK
0.1.15078							0	641.303	1920.89	1920.87	0.0193131	MS-GF+ Beta (v9517)	3	3.33486e-05	GVC[320]HIPM[16]AEPFC[57]PK
0.1.12530							0	537.953	1610.84	1610.82	0.012139	MS-GF+ Beta (v9517)	3	4.24589e-05	IKNC[320]LNPQFSK
0.1.14936							0	541.617	1621.83	1621.82	0.0057955	MS-GF+ Beta (v9517)	3	4.78678e-05	NTGIIC[320]TIGPASR
0.1.14992							0	429.892	1286.65	1286.64	0.0100706	MS-GF+ Beta (v9517)	3	9.29135e-05	TYAIC[320]GAIR
0.1.14118							0	578.643	1732.91	1732.89	0.0148352	MS-GF+ Beta (v9517)	3	9.62715e-05	IVLVDDREC[320]PVR
0.1.14960							0	811.927	1621.84	1621.82	0.0139265	MS-GF+ Beta (v9517)	2	0.00014325	NTGIIC[320]TIGPASR
0.1.15371							0	700.021	2097.04	2096.04	1.00167	MS-GF+ Beta (v9517)	3	0.000159418	IISNASC[320]TTNC[57]LAPLAK
0.1.9650							0	525.248	1572.72	1572.72	0.00583084	MS-GF+ Beta (v9517)	3	0.000191172	KC[320]YEM[16]ASHLR
0.1.15903							0	1049.03	2096.05	2096.04	0.0118748	MS-GF+ Beta (v9517)	2	0.000223748	IISNASC[320]TTNC[57]LAPLAK
0.1.9887							0	630.277	1258.54	1258.53	0.0129421	MS-GF+ Beta (v9517)	2	0.000259796	C[57]AQGC[57]IC[320]K
0.1.10510							0	508.902	1523.68	1523.67	0.0124882	MS-GF+ Beta (v9517)	3	0.000278005	YSC[320]QEGDKFK
0.1.9737							0	599.969	1796.88	1796.87	0.0180202	MS-GF+ Beta (v9517)	3	0.000389024	M[16]RPGVAC[320]SVSQAQK
0.1.9172							0	388.207	1161.6	1161.6	0.00321412	MS-GF+ Beta (v9517)	3	0.000389363	IVGC[320]SVHK
0.1.12399							0	590.959	1769.86	1769.84	0.0115882	MS-GF+ Beta (v9517)	3	0.000614789	LTDC[320]VVM[16]RDPASK
0.1.13991							0	425.219	1272.63	1272.63	0.00634196	MS-GF+ Beta (v9517)	3	0.000648855	C[320]IIPNHEK
0.1.6066							0	613.798	1225.58	1225.58	0.00608235	MS-GF+ Beta (v9517)	2	0.00071038	KTPC[320]GEGSK
0.1.21927							0	871.42	1740.83	1738.82	2.00823	MS-GF+ Beta (v9517)	2	0.000876808	KC[320]TKC[320]EYPK
0.1.10723							0	406.887	1217.64	1217.63	0.00665954	MS-GF+ Beta (v9517)	3	0.00107573	IAVHC[320]TVR
0.1.16862							0	628.835	1255.65	1254.64	1.01151	MS-GF+ Beta (v9517)	2	0.00124459	QSLLFC[320]PK
0.1.18396							0	654.364	1306.71	1306.71	0.00766425	MS-GF+ Beta (v9517)	2	0.00151104	LLC[320]GLLAER
0.1.16104							0	595.278	1188.54	1188.54	0.00281858	MS-GF+ Beta (v9517)	2	0.00156376	FC[320]PFAER
0.1.9477							0	525.251	1572.73	1572.72	0.0131551	MS-GF+ Beta (v9517)	3	0.00172474	KC[320]YEM[16]ASHLR
0.1.14364							0	622.353	1242.69	1242.68	0.0123586	MS-GF+ Beta (v9517)	2	0.00183963	AVLC[320]PPPVK
0.1.13709							0	671.326	1340.64	1340.63	0.00880213	MS-GF+ Beta (v9517)	2	0.00213762	IGNC[320]PFSQR
0.1.11230							0	684.359	1366.7	1366.69	0.0119341	MS-GF+ Beta (v9517)	2	0.00282565	KC[320]LEEQGLK
0.1.9182							0	581.811	1161.61	1161.6	0.0112535	MS-GF+ Beta (v9517)	2	0.00353395	IVGC[320]SVHK
0.1.10771							0	561.627	1681.86	1681.85	0.0132306	MS-GF+ Beta (v9517)	3	0.00363924	KDEQERC[320]ITIK
0.1.14460							0	622.351	1242.69	1242.68	0.0079641	MS-GF+ Beta (v9517)	2	0.00372023	AVLC[320]PPPVK
0.1.15872							0	843.403	1684.79	1684.79	0.00377131	MS-GF+ Beta (v9517)	2	0.00390041	NQSFC[320]PTVNLDK
0.1.8452							0	516.239	1030.46	1030.45	0.0087257	MS-GF+ Beta (v9517)	2	0.00407269	YSPNC[320]K
0.1.4475							0	543.264	1084.51	1084.51	0.00559025	MS-GF+ Beta (v9517)	2	0.004287	KC[320]SASNR
0.1.22703							0	871.41	1740.81	1739.79	1.01811	MS-GF+ Beta (v9517)	2	0.00471264	RYKC[320]NEC[320]GK
0.1.14974							0	446.253	1335.74	1335.72	0.0146741	MS-GF+ Beta (v9517)	3	0.00496327	KC[320]DLISIPK
0.1.15201							0	537.783	1073.55	1072.55	1.00217	MS-GF+ Beta (v9517)	2	0.00507364	C[320]APPLPR
0.1.14395							0	415.235	1242.68	1242.68	0.00224402	MS-GF+ Beta (v9517)	3	0.00538587	AVLC[320]PPPVK
0.1.11079							0	375.188	1122.54	1122.54	0.00271643	MS-GF+ Beta (v9517)	3	0.00709033	LC[320]QFHR
0.1.14222							0	546.756	1091.5	1091.49	0.0110268	MS-GF+ Beta (v9517)	2	0.00943945	FAC[320]FER
0.1.14862							0	548.944	1643.81	1643.8	0.0117439	MS-GF+ Beta (v9517)	3	0.0122121	VDVFREDLC[320]TK
0.1.9862							0	523.786	1045.56	1045.55	0.00891503	MS-GF+ Beta (v9517)	2	0.012617	VLVHC[320]R
0.1.9756							0	523.787	1045.56	1045.55	0.0107461	MS-GF+ Beta (v9517)	2	0.0134252	VLVHC[320]R
0.1.7837							0	462.724	923.433	923.428	0.0043937	MS-GF+ Beta (v9517)	2	0.0138236	TGAPC[320]R
0.1.24132							0	1061.5	2120.99	2121.99	-1.00168	MS-GF+ Beta (v9517)	2	0.0158982	KNLC[320]RKC[320]SENC[57]K
0.1.11265							0	778.377	1554.74	1555.75	-1.01433	MS-GF+ Beta (v9517)	2	0.0167589	MMIGRC[320]NRAGK
0.1.12904							0	618.32	1234.63	1234.61	0.0125754	MS-GF+ Beta (v9517)	2	0.0182958	AQC[320]PIVER
0.1.9582							0	449.558	1345.65	1345.64	0.00793847	MS-GF+ Beta (v9517)	3	0.01866	RC[320]QYVTEK
0.1.28015							0	921.443	1840.87	1839.86	1.00632	MS-GF+ Beta (v9517)	2	0.0195075	KLYKC[320]EEC[320]GK
JY_PYD_vitro_Sulfenylome_20150427_BR2	81	101	117	2	3	92
0.1.15061							0	787.154	3144.59	3144.57	0.0210721	MS-GF+ Beta (v9517)	4	2.645e-25	LVAEVEESPETAAHPGPIVVHC[320]SAGIGR
0.1.15084							0	1049.2	3144.59	3144.57	0.0241982	MS-GF+ Beta (v9517)	3	3.86284e-23	LVAEVEESPETAAHPGPIVVHC[320]SAGIGR
0.1.13027							0	832.416	2494.23	2494.2	0.0238676	MS-GF+ Beta (v9517)	3	2.59454e-21	ESGSLSPEHGPVVVHC[320]SAGIGR
0.1.13016							0	624.564	2494.23	2494.2	0.0246478	MS-GF+ Beta (v9517)	4	3.71703e-21	ESGSLSPEHGPVVVHC[320]SAGIGR
0.1.12912							0	624.81	2495.21	2494.2	1.00853	MS-GF+ Beta (v9517)	4	3.24574e-20	ESGSLSPEHGPVVVHC[320]SAGIGR
0.1.18254							0	1097.52	3289.53	3289.51	0.0192923	MS-GF+ Beta (v9517)	3	8.84794e-20	SGDAAIVDM[16]VPGKPM[16]C[320]VESFSDYPPLGR
0.1.18373							0	842.758	2525.25	2525.24	0.0159177	MS-GF+ Beta (v9517)	3	4.04208e-19	GPAVGIDLGTTYSC[320]VGVFQHGK
0.1.12924							0	832.413	2494.22	2494.2	0.0145293	MS-GF+ Beta (v9517)	3	1.24949e-18	ESGSLSPEHGPVVVHC[320]SAGIGR
0.1.18237							0	823.387	3289.52	3289.51	0.010551	MS-GF+ Beta (v9517)	4	2.48502e-17	SGDAAIVDM[16]VPGKPM[16]C[320]VESFSDYPPLGR
0.1.14530							0	788.052	2361.14	2361.12	0.0148641	MS-GF+ Beta (v9517)	3	5.46435e-17	QESIM[16]DAGPVVVHC[320]SAGIGR
0.1.15664							0	1049.03	2096.05	2096.04	0.00601547	MS-GF+ Beta (v9517)	2	2.23097e-15	IISNASC[320]TTNC[57]LAPLAK
0.1.22230							0	821.933	3283.7	3283.69	0.0154631	MS-GF+ Beta (v9517)	4	2.28582e-15	DGNASGTTLLEALDC[320]ILPPTRPTDKPLR
0.1.13939							0	528.516	2110.03	2110.02	0.0166728	MS-GF+ Beta (v9517)	4	2.46108e-15	NPPELIGVHC[320]THGFNR
0.1.15656							0	699.69	2096.05	2096.04	0.00905394	MS-GF+ Beta (v9517)	3	2.71166e-15	IISNASC[320]TTNC[57]LAPLAK
0.1.14571							0	591.292	2361.14	2361.12	0.0172923	MS-GF+ Beta (v9517)	4	1.06207e-14	QESIM[16]DAGPVVVHC[320]SAGIGR
0.1.9301							0	684.994	2051.96	2051.95	0.0111269	MS-GF+ Beta (v9517)	3	3.2284e-14	ATC[320]APQHGAPGPGPADASK
0.1.15558							0	699.694	2096.06	2096.04	0.0218713	MS-GF+ Beta (v9517)	3	1.77323e-13	IISNASC[320]TTNC[57]LAPLAK
0.1.12941							0	677.002	2027.98	2027.97	0.0189227	MS-GF+ Beta (v9517)	3	1.77477e-13	LM[16]DQNLKC[320]LSAAEEK
0.1.15447							0	981.805	2942.39	2942.38	0.0100725	MS-GF+ Beta (v9517)	3	2.28721e-13	ERPTPSLNNNC[320]TTSEDSLVLYNR
0.1.14217							0	666.628	1996.86	1996.85	0.0150574	MS-GF+ Beta (v9517)	3	4.34828e-13	C[57]C[57]LTYC[320]FNKPEDK
0.1.15564							0	1049.03	2096.05	2096.04	0.0128514	MS-GF+ Beta (v9517)	2	6.32756e-12	IISNASC[320]TTNC[57]LAPLAK
0.1.14757							0	619.951	1856.83	1856.83	2.34037e-05	MS-GF+ Beta (v9517)	3	3.81234e-11	NC[320]LTNFHGM[16]DLTR
0.1.10985							0	685.325	2052.95	2052.93	0.019726	MS-GF+ Beta (v9517)	3	5.4111e-11	HELQANC[320]YEEVKDR
0.1.14320							0	671.669	2011.98	2011.97	0.0138984	MS-GF+ Beta (v9517)	3	8.99726e-11	LMDQNLKC[320]LSAAEEK
0.1.13044							0	696.027	2085.06	2085.04	0.0152198	MS-GF+ Beta (v9517)	3	9.605e-11	EIVHIQAGQC[320]GNQIGAK
0.1.10997							0	514.245	2052.95	2052.93	0.018492	MS-GF+ Beta (v9517)	4	1.00131e-10	HELQANC[320]YEEVKDR
0.1.13011							0	922.091	2763.25	2763.24	0.0149246	MS-GF+ Beta (v9517)	3	1.00977e-10	KAAAPAPEEEM[16]DEC[320]EQALAAEPK
0.1.14344							0	623.313	1866.92	1866.9	0.0139447	MS-GF+ Beta (v9517)	3	1.4053e-10	KC[320]SLPAEEDSVLEK
0.1.15425							0	555.942	1664.8	1664.79	0.0154461	MS-GF+ Beta (v9517)	3	1.76492e-10	YNPTWHC[320]IVGR
0.1.19676							0	974.524	1947.03	1947.02	0.00810602	MS-GF+ Beta (v9517)	2	1.84747e-10	AAVEEGIVLGGGC[320]ALLR
0.1.14984							0	564.953	1691.84	1691.82	0.0160105	MS-GF+ Beta (v9517)	3	2.34743e-10	GEAVGVHC[320]ALGFGR
0.1.17907							0	656.669	1966.99	1966.97	0.0138914	MS-GF+ Beta (v9517)	3	7.54331e-10	AC[320]QSIYPLHDVFVR
0.1.19669							0	650.019	1947.04	1947.02	0.0117548	MS-GF+ Beta (v9517)	3	1.06666e-09	AAVEEGIVLGGGC[320]ALLR
0.1.12561							0	576.944	1727.81	1727.79	0.0155835	MS-GF+ Beta (v9517)	3	1.22976e-09	SYC[320]AEIAHNVSSK
0.1.14290							0	623.965	1868.87	1868.86	0.0115034	MS-GF+ Beta (v9517)	3	4.40358e-09	FIC[320]EQDHQNFLR
0.1.12200							0	504.589	1510.74	1510.74	0.00900456	MS-GF+ Beta (v9517)	3	5.87857e-09	FAC[320]HSASLTVR
0.1.17826							0	808.957	1615.9	1615.89	0.0119008	MS-GF+ Beta (v9517)	2	6.70093e-09	LVILANNC[320]PALR
0.1.16031							0	700.018	2097.03	2096.04	0.992147	MS-GF+ Beta (v9517)	3	6.74492e-09	IISNASC[320]TTNC[57]LAPLAK
0.1.10602							0	508.902	1523.68	1523.67	0.012946	MS-GF+ Beta (v9517)	3	1.35377e-08	YSC[320]QEGDKFK
0.1.9629							0	474.926	1421.76	1421.74	0.0103681	MS-GF+ Beta (v9517)	3	3.13061e-08	TVAKC[320]QVTPR
0.1.19058							0	691.044	2070.11	2070.09	0.018048	MS-GF+ Beta (v9517)	3	7.45783e-08	VAHALAEGLGVIAC[320]IGEK
0.1.17834							0	539.641	1615.9	1615.89	0.0148172	MS-GF+ Beta (v9517)	3	9.10288e-08	LVILANNC[320]PALR
0.1.19451							0	606.661	1816.96	1816.95	0.0104209	MS-GF+ Beta (v9517)	3	1.5141e-07	SLHDALC[320]VLAQTVK
0.1.15380							0	1049.52	2097.03	2096.04	0.991367	MS-GF+ Beta (v9517)	2	3.36349e-07	IISNASC[320]TTNC[57]LAPLAK
0.1.13645							0	747.369	1492.72	1492.71	0.0100334	MS-GF+ Beta (v9517)	2	4.42144e-07	AHVVPC[320]FDASK
0.1.16882							0	531.928	1592.76	1592.75	0.00684895	MS-GF+ Beta (v9517)	3	7.33801e-07	DVIEEYFKC[320]K
0.1.9655							0	711.884	1421.75	1421.74	0.00781791	MS-GF+ Beta (v9517)	2	7.7231e-07	TVAKC[320]QVTPR
0.1.7515							0	611.307	1220.6	1220.6	0.00295689	MS-GF+ Beta (v9517)	2	1.15221e-06	TATAVAHC[320]K
0.1.12387							0	670.002	2006.98	2006.97	0.00992969	MS-GF+ Beta (v9517)	3	1.16727e-06	KPNVGC[320]QQDSEELLK
0.1.12969							0	1015	2027.98	2027.97	0.0106352	MS-GF+ Beta (v9517)	2	1.26357e-06	LM[16]DQNLKC[320]LSAAEEK
0.1.15700							0	625.647	1873.92	1873.92	0.00135318	MS-GF+ Beta (v9517)	3	1.55905e-06	AHEILPNLVC[320]C[57]SAK
0.1.9780							0	599.969	1796.88	1796.87	0.0174709	MS-GF+ Beta (v9517)	3	2.19172e-06	M[16]RPGVAC[320]SVSQAQK
0.1.14881							0	462.906	1385.7	1385.69	0.00980266	MS-GF+ Beta (v9517)	3	2.70699e-06	STLTDSLVC[320]K
0.1.15542							0	632.993	1895.96	1895.94	0.0148585	MS-GF+ Beta (v9517)	3	3.66996e-06	VNQIGSVTESLQAC[320]K
0.1.15351							0	700.023	2097.05	2096.04	1.00625	MS-GF+ Beta (v9517)	3	6.44733e-06	IISNASC[320]TTNC[57]LAPLAK
0.1.9950							0	630.276	1258.54	1258.53	0.0125759	MS-GF+ Beta (v9517)	2	1.01727e-05	C[57]AQGC[57]IC[320]K
0.1.10690							0	406.888	1217.64	1217.63	0.0088568	MS-GF+ Beta (v9517)	3	1.25595e-05	IAVHC[320]TVR
0.1.16901							0	1016.47	2030.93	2030.92	0.00537678	MS-GF+ Beta (v9517)	2	1.72338e-05	LEDEHLVFFC[320]QM[16]GK
0.1.10981							0	443.563	1327.67	1327.66	0.011656	MS-GF+ Beta (v9517)	3	1.89134e-05	ISIC[320]SSDKR
0.1.15042							0	429.892	1286.65	1286.64	0.0104368	MS-GF+ Beta (v9517)	3	2.27416e-05	TYAIC[320]GAIR
0.1.16902							0	508.74	2030.93	2030.92	0.00766955	MS-GF+ Beta (v9517)	4	2.84014e-05	LEDEHLVFFC[320]QM[16]GK
0.1.16937							0	598.649	1792.92	1792.91	0.009636	MS-GF+ Beta (v9517)	3	3.31787e-05	VPTANVSVVDLTC[320]R
0.1.14383							0	594.283	1186.55	1186.54	0.00649454	MS-GF+ Beta (v9517)	2	3.59244e-05	FC[320]LDNGAK
0.1.9716							0	525.25	1572.73	1572.72	0.0102254	MS-GF+ Beta (v9517)	3	4.05126e-05	KC[320]YEM[16]ASHLR
0.1.13637							0	498.58	1492.72	1492.71	0.00590029	MS-GF+ Beta (v9517)	3	5.11618e-05	AHVVPC[320]FDASK
0.1.19096							0	518.536	2070.11	2070.09	0.0204761	MS-GF+ Beta (v9517)	4	7.10831e-05	VAHALAEGLGVIAC[320]IGEK
0.1.12510							0	666.335	1995.98	1995.97	0.00986452	MS-GF+ Beta (v9517)	3	9.30889e-05	NYLEPGKEC[320]VQPATK
0.1.14227							0	542.925	1625.75	1625.74	0.00790723	MS-GF+ Beta (v9517)	3	9.9805e-05	NM[16]SVHLSPC[320]FR
0.1.18047							0	672.655	2014.94	2014.93	0.014011	MS-GF+ Beta (v9517)	3	0.000109571	LEDEHLVFFC[320]QMGK
0.1.12311							0	616.277	1230.54	1230.53	0.00858917	MS-GF+ Beta (v9517)	2	0.000117768	AC[320]VMM[16]QGR
0.1.12446							0	590.961	1769.86	1769.84	0.0157996	MS-GF+ Beta (v9517)	3	0.000133211	LTDC[320]VVM[16]RDPASK
0.1.14029							0	425.219	1272.64	1272.63	0.00771525	MS-GF+ Beta (v9517)	3	0.000140174	C[320]IIPNHEK
0.1.14363							0	615.313	1228.61	1228.6	0.00946819	MS-GF+ Beta (v9517)	2	0.000150139	SC[320]QFVAVR
0.1.16893							0	628.332	1254.65	1254.64	0.00662987	MS-GF+ Beta (v9517)	2	0.000200733	QSLLFC[320]PK
0.1.8229							0	742.853	1483.69	1483.68	0.00804852	MS-GF+ Beta (v9517)	2	0.000237068	TGSQGQC[320]TQVR
0.1.12917							0	696.029	2085.06	2085.04	0.0216284	MS-GF+ Beta (v9517)	3	0.000306674	EIVHIQAGQC[320]GNQIGAK
0.1.6147							0	613.798	1225.58	1225.58	0.00620442	MS-GF+ Beta (v9517)	2	0.000320274	KTPC[320]GEGSK
0.1.4688							0	362.511	1084.51	1084.51	0.00270832	MS-GF+ Beta (v9517)	3	0.000472146	KC[320]SASNR
0.1.9252							0	581.809	1161.6	1161.6	0.00734728	MS-GF+ Beta (v9517)	2	0.000493768	IVGC[320]SVHK
0.1.10498							0	518.771	1035.53	1035.52	0.00963387	MS-GF+ Beta (v9517)	2	0.000497885	APQC[320]LGK
0.1.10870							0	561.626	1681.86	1681.85	0.0115826	MS-GF+ Beta (v9517)	3	0.000617529	KDEQERC[320]ITIK
0.1.12559							0	842.74	2525.2	2524.2	0.998028	MS-GF+ Beta (v9517)	3	0.000626927	NLVSLDISSKC[320]M[16]MEFSSIGK
0.1.4663							0	543.264	1084.51	1084.51	0.00510197	MS-GF+ Beta (v9517)	2	0.00147005	KC[320]SASNR
0.1.18281							0	870.425	1738.83	1738.82	0.0177477	MS-GF+ Beta (v9517)	2	0.00152091	KC[320]TKC[320]EYPK
0.1.10583							0	762.846	1523.68	1523.67	0.00581817	MS-GF+ Beta (v9517)	2	0.00184427	YSC[320]QEGDKFK
0.1.9269							0	388.207	1161.6	1161.6	0.00339723	MS-GF+ Beta (v9517)	3	0.00244994	IVGC[320]SVHK
0.1.15615							0	590.958	1769.85	1769.84	0.00873901	MS-GF+ Beta (v9517)	3	0.00283283	APPC[320]EYKDWLTK
0.1.24235							0	1061.5	2120.99	2121.99	-1.00168	MS-GF+ Beta (v9517)	2	0.00609099	KNLC[320]RKC[320]SENC[57]K
0.1.13414							0	530.609	1588.81	1588.79	0.0146889	MS-GF+ Beta (v9517)	3	0.00630339	IIYGGSVTGATC[320]K
0.1.19068							0	598.833	1195.65	1195.64	0.00918921	MS-GF+ Beta (v9517)	2	0.00642688	GIFPVLC[320]K
0.1.14857							0	1048.52	2095.03	2096.04	-1.00692	MS-GF+ Beta (v9517)	2	0.00652321	IISNASC[320]TTNC[57]LAPLAK
0.1.14541							0	431.214	1290.62	1290.61	0.0114025	MS-GF+ Beta (v9517)	3	0.00656596	SAFLC[320]GVM[16]K
0.1.14294							0	546.754	1091.49	1091.49	0.00773087	MS-GF+ Beta (v9517)	2	0.00657967	FAC[320]FER
0.1.9887							0	523.786	1045.56	1045.55	0.00854882	MS-GF+ Beta (v9517)	2	0.00747639	VLVHC[320]R
0.1.9781							0	523.786	1045.56	1045.55	0.00867089	MS-GF+ Beta (v9517)	2	0.007491	VLVHC[320]R
0.1.13784							0	671.324	1340.63	1340.63	0.00294276	MS-GF+ Beta (v9517)	2	0.00763319	IGNC[320]PFSQR
0.1.10762							0	561.625	1681.85	1681.85	0.00865294	MS-GF+ Beta (v9517)	3	0.007645	KDEQERC[320]ITIK
0.1.7873							0	462.723	923.432	923.428	0.00390542	MS-GF+ Beta (v9517)	2	0.00801365	TGAPC[320]R
0.1.15208							0	537.782	1073.55	1072.55	1.00156	MS-GF+ Beta (v9517)	2	0.00805585	C[320]APPLPR
0.1.27145							0	1172.55	2343.09	2342.09	0.999756	MS-GF+ Beta (v9517)	2	0.0113523	VGEQLPQEMC[57]AFC[320]QAIAK
0.1.22393							0	953.44	1904.87	1904.87	-0.0055184	MS-GF+ Beta (v9517)	2	0.012329	RC[320]KFC[320]HVC[57]GR
0.1.13395							0	502.915	1505.72	1505.71	0.0111562	MS-GF+ Beta (v9517)	3	0.0126951	HC[320]NMVLENVK
0.1.12711							0	930.482	1858.95	1859.97	-1.01546	MS-GF+ Beta (v9517)	2	0.0130219	KFIAYC[320]RVKCGPR
0.1.10437							0	930.481	1858.95	1859.97	-1.01864	MS-GF+ Beta (v9517)	2	0.0135707	KFIAYC[320]RVKCGPR
0.1.23518							0	1061.49	2120.97	2121.99	-1.02169	MS-GF+ Beta (v9517)	2	0.0140008	KNLC[320]RKC[320]SENC[57]K
0.1.9369							0	686.325	1370.64	1369.64	0.991045	MS-GF+ Beta (v9517)	2	0.014084	NC[320]LNPQFSK
0.1.22720							0	953.95	1905.89	1904.87	1.0145	MS-GF+ Beta (v9517)	2	0.0145954	RC[320]KFC[320]HVC[57]GR
0.1.27246							0	1172.56	2343.11	2342.09	1.01978	MS-GF+ Beta (v9517)	2	0.0193871	VGEQLPQEMC[57]AFC[320]QAIAK
0.1.12367							0	620.659	1858.95	1859.97	-1.0109	MS-GF+ Beta (v9517)	3	0.0197283	KFIAYC[320]RVKCGPR
0.1.7515							0	611.307	1220.6	1220.6	0.00290827	TagRecon 1.4.47	2	0.00275555	TATAVAHC[320]K
0.1.8229							0	742.853	1483.69	1483.68	0.00808925	TagRecon 1.4.47	2	0.0117761	TGSQGQC[320]TQVR
0.1.9301							0	684.994	2051.96	2051.95	0.0110779	TagRecon 1.4.47	3	0.000908524	ATC[320]APQHGAPGPGPADASK
0.1.9629							0	474.926	1421.76	1421.74	0.0103607	TagRecon 1.4.47	3	0.00343491	TVAKC[320]QVTPR
0.1.9634							0	449.558	1345.65	1345.64	0.00764418	TagRecon 1.4.47	3	0.00346639	RC[320]QYVTEK
0.1.9655							0	711.884	1421.75	1421.74	0.00782437	TagRecon 1.4.47	2	0.00248629	TVAKC[320]QVTPR
0.1.9716							0	525.25	1572.73	1572.72	0.0102896	TagRecon 1.4.47	3	0.0033914	KC[320]YEM[16]ASHLR
0.1.10985							0	685.325	2052.95	2052.93	0.0197455	TagRecon 1.4.47	3	0.00231882	HELQANC[320]YEEVKDR
0.1.12200							0	504.589	1510.74	1510.74	0.00899403	TagRecon 1.4.47	3	0.00286854	FAC[320]HSASLTVR
0.1.12387							0	670.002	2006.98	2006.97	0.0099694	TagRecon 1.4.47	3	0.00280737	KPNVGC[320]QQDSEELLK
0.1.12561							0	576.944	1727.81	1727.79	0.0156586	TagRecon 1.4.47	3	0.00315621	SYC[320]AEIAHNVSSK
0.1.12577							0	537.955	1610.84	1610.82	0.0184973	TagRecon 1.4.47	3	0.00311689	IKNC[320]LNPQFSK
0.1.12941							0	677.002	2027.98	2027.97	0.0188814	TagRecon 1.4.47	3	0.00212444	LM[16]DQNLKC[320]LSAAEEK
0.1.12969							0	1015	2027.98	2027.97	0.0106081	TagRecon 1.4.47	2	0.00266046	LM[16]DQNLKC[320]LSAAEEK
0.1.13011							0	922.091	2763.25	2763.24	0.0150012	TagRecon 1.4.47	3	0.00229022	KAAAPAPEEEM[16]DEC[320]EQALAAEPK
0.1.13016							0	624.564	2494.23	2494.2	0.0247105	TagRecon 1.4.47	4	0	ESGSLSPEHGPVVVHC[320]SAGIGR
0.1.13027							0	832.416	2494.23	2494.2	0.0238334	TagRecon 1.4.47	3	0	ESGSLSPEHGPVVVHC[320]SAGIGR
0.1.13044							0	696.027	2085.06	2085.04	0.0151744	TagRecon 1.4.47	3	0.0020664	EIVHLQAGQC[320]GNQIGAK
0.1.13637							0	498.58	1492.72	1492.71	0.00587513	TagRecon 1.4.47	3	0.0165767	AHVVPC[320]FDASK
0.1.13730							0	600.972	1799.89	1799.89	0.0065427	TagRecon 1.4.47	3	0.00891	KLENC[320]NYAVELGK
0.1.13939							0	528.516	2110.03	2110.02	0.0166906	TagRecon 1.4.47	4	0.019961	NPPELIGVHC[320]THGFNR
0.1.13999							0	704.354	2110.04	2110.02	0.0238889	TagRecon 1.4.47	3	0.00236219	NPPELIGVHC[320]THGFNR
0.1.14217							0	666.628	1996.86	1996.85	0.0151207	TagRecon 1.4.47	3	0.00290523	C[57]C[57]LTYC[320]FNKPEDK
0.1.14227							0	542.925	1625.75	1625.74	0.00784398	TagRecon 1.4.47	3	0.00935545	NM[16]SVHLSPC[320]FR
0.1.14290							0	623.965	1868.87	1868.86	0.0114175	TagRecon 1.4.47	3	0.0165003	FIC[320]EQDHQNFLR
0.1.14320							0	671.669	2011.98	2011.97	0.0138183	TagRecon 1.4.47	3	0.00293757	LMDQNLKC[320]LSAAEEK
0.1.14344							0	623.313	1866.92	1866.9	0.0139198	TagRecon 1.4.47	3	0.0026236	KC[320]SLPAEEDSVLEK
0.1.14530							0	788.052	2361.14	2361.12	0.0148793	TagRecon 1.4.47	3	0.00155471	QESIM[16]DAGPVVVHC[320]SAGIGR
0.1.14571							0	591.292	2361.14	2361.12	0.0173253	TagRecon 1.4.47	4	0.0108285	QESIM[16]DAGPVVVHC[320]SAGIGR
0.1.14757							0	619.951	1856.83	1856.83	8.89109e-05	TagRecon 1.4.47	3	0.00240116	NC[320]LTNFHGM[16]DLTR
0.1.14881							0	462.906	1385.7	1385.69	0.00983839	TagRecon 1.4.47	3	0.00322108	STLTDSLVC[320]K
0.1.14888							0	446.252	1335.74	1335.72	0.0132042	TagRecon 1.4.47	3	0.00300745	KC[320]DLISIPK
0.1.14994							0	446.252	1335.73	1335.72	0.0115927	TagRecon 1.4.47	3	0.00283304	KC[320]DLISIPK
0.1.15061							0	787.154	3144.59	3144.57	0.0211507	TagRecon 1.4.47	4	0.0081331	LVAEVEESPETAAHPGPIVVHC[320]SAGIGR
0.1.15084							0	1049.2	3144.59	3144.57	0.0242147	TagRecon 1.4.47	3	0.000530824	LVAEVEESPETAAHPGPIVVHC[320]SAGIGR
0.1.15425							0	555.942	1664.8	1664.79	0.0154808	TagRecon 1.4.47	3	0.00317191	YNPTWHC[320]IVGR
0.1.15447							0	981.805	2942.39	2942.38	0.0101126	TagRecon 1.4.47	3	0.00181878	ERPTPSLNNNC[320]TTSEDSLVLYNR
0.1.15542							0	632.993	1895.96	1895.94	0.0147773	TagRecon 1.4.47	3	0.00317327	VNQIGSVTESLQAC[320]K
0.1.15558							0	699.694	2096.06	2096.04	0.0219715	TagRecon 1.4.47	3	0.00249196	IISNASC[320]TTNC[57]LAPLAK
0.1.15564							0	1049.03	2096.05	2096.04	0.0129924	TagRecon 1.4.47	2	0.00212022	IISNASC[320]TTNC[57]LAPLAK
0.1.15656							0	699.69	2096.05	2096.04	0.00909443	TagRecon 1.4.47	3	0.00253205	IISNASC[320]TTNC[57]LAPLAK
0.1.15664							0	1049.03	2096.05	2096.04	0.00615314	TagRecon 1.4.47	2	0.0010849	IISNASC[320]TTNC[57]LAPLAK
0.1.15768							0	699.696	2096.07	2096.04	0.026431	TagRecon 1.4.47	3	0.00303991	IISNASC[320]TTNC[57]LAPLAK
0.1.16882							0	531.928	1592.76	1592.75	0.0067912	TagRecon 1.4.47	3	0.00326159	DVIEEYFKC[320]K
0.1.16937							0	598.649	1792.92	1792.91	0.00957378	TagRecon 1.4.47	3	0.00243246	VPTANVSVVDLTC[320]R
0.1.17826							0	808.957	1615.9	1615.89	0.0119241	TagRecon 1.4.47	2	0.00222505	LVILANNC[320]PALR
0.1.17834							0	539.641	1615.9	1615.89	0.0148852	TagRecon 1.4.47	3	0.0027578	LVILANNC[320]PALR
0.1.17907							0	656.669	1966.99	1966.97	0.0138047	TagRecon 1.4.47	3	0.0020411	AC[320]QSIYPLHDVFVR
0.1.18047							0	672.655	2014.94	2014.93	0.0139469	TagRecon 1.4.47	3	0.018544	LEDEHLVFFC[320]QMGK
0.1.18237							0	823.387	3289.52	3289.51	0.0105622	TagRecon 1.4.47	4	0.0141951	SGDAAIVDM[16]VPGKPM[16]C[320]VESFSDYPPLGR
0.1.18373							0	842.758	2525.25	2525.24	0.0160065	TagRecon 1.4.47	3	0.00179532	GPAVGIDLGTTYSC[320]VGVFQHGK
0.1.19148							0	726.697	2177.07	2177.05	0.0243123	TagRecon 1.4.47	3	0.00228259	GQKC[320]EFQDAYVLLSEK
0.1.19451							0	606.661	1816.96	1816.95	0.0105086	TagRecon 1.4.47	3	0.00257784	SLHDALC[320]VLAQTVK
0.1.19669							0	650.019	1947.04	1947.02	0.0117142	TagRecon 1.4.47	3	0.00218573	AAVEEGIVLGGGC[320]ALLR
0.1.19676							0	974.524	1947.03	1947.02	0.00805608	TagRecon 1.4.47	2	0.00159758	AAVEEGIVLGGGC[320]ALLR
0.1.22230							0	821.933	3283.7	3283.69	0.0154088	TagRecon 1.4.47	4	0.019859	DGNASGTTLLEALDC[320]ILPPTRPTDKPLR

## Sheet: Peptide View
Sequence	Filtered Spectra	Monoisotopic Mass	Molecular Weight	Protein Accessions
IISNASC[320]TTNC[57]LAPLAK (+3)	10	2096.04	2097.19	NP_002037.2|,NP_001243728.1|
IISNASC[320]TTNC[57]LAPLAK (+2)	8	2096.04	2097.19	NP_002037.2|,NP_001243728.1|
ESGSLSPEHGPVVVHC[320]SAGIGR (+3)	4	2494.2	2495.53	NP_002818.1|
ESGSLSPEHGPVVVHC[320]SAGIGR (+4)	4	2494.2	2495.53	NP_002818.1|
KC[320]DLISIPK (+3)	4	1335.72	1336.4	NP_055140.1|
EIVHIQAGQC[320]GNQIGAK (+3)	4	2085.04	1765.99	NP_821133.1|,NP_821080.1|,NP_001060.1|,NP_006077.2|
VLVHC[320]R (+2)	4	1045.55	725.903	NP_004081.1|
KC[320]YEM[16]ASHLR (+3)	3	1572.72	1573.59	NP_005013.1|
EIVHLQAGQC[320]GNQIGAK (+3)	3	2085.04	2086.14	NP_006078.2|,NP_006079.1|
AAVEEGIVLGGGC[320]ALLR (+3)	3	1947.02	1948.05	NP_002147.2|,NP_955472.1|
NPPELIGVHC[320]THGFNR (+4)	3	2110.02	2111.15	NP_003791.3|
KDEQERC[320]ITIK (+3)	3	1681.85	1362.55	NP_001952.1|
KNLC[320]RKC[320]SENC[57]K (+2)	3	2121.99	1425.7	NP_001177411.1|,NP_006191.2|
ATC[320]APQHGAPGPGPADASK (+3)	2	2051.95	2053.02	NP_001447.2|,NP_001104026.1|
RC[320]QYVTEK (+3)	2	1345.64	1346.32	NP_001230106.1|,NP_000025.1|,NP_908930.1|,NP_908932.1|,NP_001121089.1|,NP_005156.1|
TVAKC[320]QVTPR (+3)	2	1421.74	1422.46	NP_001193496.1|,NP_005522.2|
HELQANC[320]YEEVKDR (+3)	2	2052.93	2054	NP_005498.1|
FAC[320]HSASLTVR (+3)	2	1510.74	1511.51	NP_031389.3|,NP_001138880.1|,NP_001138881.1|,NP_001138882.1|
LTDC[320]VVM[16]RDPASK (+3)	2	1769.84	1434.68	NP_002128.1|,NP_112533.1|
SYC[320]AEIAHNVSSK (+3)	2	1727.79	1728.68	NP_000985.1|,NP_001007074.1|,NP_001007075.1|
LM[16]DQNLKC[320]LSAAEEK (+3)	2	2027.97	2029.1	NP_705935.1|,NP_001036817.1|
LM[16]DQNLKC[320]LSAAEEK (+2)	2	2027.97	2029.1	NP_705935.1|,NP_001036817.1|
KAAAPAPEEEM[16]DEC[320]EQALAAEPK (+3)	2	2763.24	2764.79	NP_001395.1|
AHVVPC[320]FDASK (+3)	2	1492.71	1493.49	NP_001447.2|,NP_001104026.1|
NPPELIGVHC[320]THGFNR (+3)	2	2110.02	2111.15	NP_003791.3|
C[57]C[57]LTYC[320]FNKPEDK (+3)	2	1996.85	1998.01	NP_001129064.1|,NP_002945.1|,NP_001170884.1|
FIC[320]EQDHQNFLR (+3)	2	1868.86	1869.86	NP_006635.2|
LMDQNLKC[320]LSAAEEK (+3)	2	2011.97	2013.1	NP_705935.1|,NP_001036817.1|
KC[320]SLPAEEDSVLEK (+3)	2	1866.9	1867.87	NP_002366.2|,NP_001127836.1|
QESIM[16]DAGPVVVHC[320]SAGIGR (+3)	2	2361.12	2362.44	NP_002825.3|
NC[320]LTNFHGM[16]DLTR (+3)	2	1856.83	1857.86	NP_000997.1|
TYAIC[320]GAIR (+3)	2	1286.64	967.143	NP_001015.1|
GEAVGVHC[320]ALGFGR (+3)	2	1691.82	1372.55	NP_060293.2|
LVAEVEESPETAAHPGPIVVHC[320]SAGIGR (+4)	2	3144.57	3146.29	NP_002823.3|,NP_542155.1|,NP_001186726.1|
LVAEVEESPETAAHPGPIVVHC[320]SAGIGR (+3)	2	3144.57	3146.29	NP_002823.3|,NP_542155.1|,NP_001186726.1|
YNPTWHC[320]IVGR (+3)	2	1664.79	1665.68	NP_001032583.1|,NP_001032584.1|,NP_003737.1|,NP_542408.1|
ERPTPSLNNNC[320]TTSEDSLVLYNR (+3)	2	2942.38	2943.96	NP_004437.2|
VNQIGSVTESLQAC[320]K (+3)	2	1895.94	1896.92	NP_001419.1|,NP_001188412.1|
LEDEHLVFFC[320]QM[16]GK (+2)	2	2030.92	1695.96	NP_001106676.1|,NP_001106677.1|,NP_001106678.1|
LVILANNC[320]PALR (+2)	2	1615.89	1616.73	NP_000980.1|
LVILANNC[320]PALR (+3)	2	1615.89	1616.73	NP_000980.1|
AC[320]QSIYPLHDVFVR (+3)	2	1966.97	1968.04	NP_000997.1|
SGDAAIVDM[16]VPGKPM[16]C[320]VESFSDYPPLGR (+3)	2	3289.51	2939.34	NP_001393.1|
GPAVGIDLGTTYSC[320]VGVFQHGK (+3)	2	2525.24	2526.63	NP_006588.1|,NP_694881.1|
VAHALAEGLGVIAC[320]IGEK (+3)	2	2070.09	1751.06	NP_001244955.1|,NP_000356.1|,NP_001152759.1|
GQKC[320]EFQDAYVLLSEK (+3)	2	2177.05	2178.23	NP_002147.2|,NP_955472.1|
SLHDALC[320]VLAQTVK (+3)	2	1816.95	1817.91	NP_001185771.1|,NP_006422.1|
AAVEEGIVLGGGC[320]ALLR (+2)	2	1947.02	1948.05	NP_002147.2|,NP_955472.1|
SGDAAIVDM[16]VPGKPM[16]C[320]VESFSDYPPLGR (+4)	2	3289.51	3291.48	NP_001393.1|
QESIM[16]DAGPVVVHC[320]SAGIGR (+4)	2	2361.12	2362.44	NP_002825.3|
DGNASGTTLLEALDC[320]ILPPTRPTDKPLR (+4)	2	3283.69	3285.49	NP_001393.1|
HELQANC[320]YEEVKDR (+4)	2	2052.93	1733.86	NP_005498.1|
KPNVGC[320]QQDSEELLK (+3)	2	2006.97	2008.02	NP_060697.4|
IKNC[320]LNPQFSK (+3)	2	1610.82	1611.67	NP_003900.1|
C[57]AQGC[57]IC[320]K (+2)	2	1258.53	825.032	NP_005943.1|,NP_005942.1|,NP_005941.1|,NP_005944.1|,NP_005937.2|
YSC[320]QEGDKFK (+3)	2	1523.67	1204.31	NP_005969.1|
M[16]RPGVAC[320]SVSQAQK (+3)	2	1796.87	1461.71	NP_000652.2|,NP_001020092.1|
IVGC[320]SVHK (+3)	2	1161.6	842.018	NP_112604.2|,NP_004491.2|,NP_001070910.1|,NP_001070911.1|,NP_776247.3|,NP_001093861.1|,NP_001093862.1|,NP_001093863.1|
C[320]IIPNHEK (+3)	2	1272.63	953.117	NP_001242941.1|,NP_002464.1|,NP_005955.3|,NP_001243024.1|,NP_074035.1|,NP_001035202.1|,NP_001035203.1|,NP_002465.1|
KTPC[320]GEGSK (+2)	2	1225.58	906.016	NP_001014.1|,NP_001139699.1|
KC[320]TKC[320]EYPK (+2)	2	1738.82	1099.32	XXX_NP_110451.1|
IAVHC[320]TVR (+3)	2	1217.63	898.085	NP_000966.2|,NP_001186731.1|
QSLLFC[320]PK (+2)	2	1254.64	935.141	NP_001014446.1|,NP_689611.1|
AVLC[320]PPPVK (+2)	2	1242.68	923.174	NP_008839.2|,NP_061485.1|,NP_005043.1|
IGNC[320]PFSQR (+2)	2	1340.63	1021.15	NP_001279.2|,NP_058625.2|,NP_001242952.1|,NP_001107558.1|,NP_444507.1|,NP_039234.1|
IVGC[320]SVHK (+2)	2	1161.6	842.018	NP_112604.2|,NP_004491.2|,NP_001070910.1|,NP_001070911.1|,NP_776247.3|,NP_001093861.1|,NP_001093862.1|,NP_001093863.1|
KC[320]SASNR (+2)	2	1084.51	764.851	NP_001015.1|
C[320]APPLPR (+2)	2	1072.55	752.925	NP_001076783.1|
FAC[320]FER (+2)	2	1091.49	771.883	NP_998776.1|,NP_002626.1|,NP_005879.1|
TGAPC[320]R (+2)	2	923.428	603.692	NP_001967.3|,NP_443739.3|,NP_001180432.1|,NP_001966.1|,NP_001419.1|,NP_001188412.1|
VGEQLPQEMC[57]AFC[320]QAIAK (+2)	2	2342.09	1966.31	XXX_NP_001010906.1|
RC[320]KFC[320]HVC[57]GR (+2)	2	1904.87	1208.48	NP_055542.1|,NP_005924.2|,NP_001184033.1|
KFIAYC[320]RVKCGPR (+2)	2	1859.97	1540.9	NP_006730.2|
DRC[320]TLAEK (+3)	1	1254.6	1255.21	NP_005498.1|
KM[16]EDSVGC[320]LETAEEVK (+3)	1	2102.95	2104.12	NP_002464.1|
FIC[320]TTSAIQNR (+2)	1	1572.77	1253.43	NP_942127.1|,NP_001087.2|
IVLVDDREC[320]PVR (+3)	1	1732.89	1413.64	NP_036525.1|
KVFANPEDC[320]VAFGK (+3)	1	1843.89	1524.74	NP_665735.1|,NP_064696.1|,NP_665734.1|,NP_665707.1|,NP_001247440.1|,NP_001247441.1|,NP_001254527.1|
STLTDSLVC[320]K (+2)	1	1385.69	1066.23	NP_001952.1|
VWNLANC[320]K (+2)	1	1266.62	1267.26	NP_006089.1|
NTGIIC[320]TIGPASR (+3)	1	1621.82	1302.5	NP_002645.3|,NP_872270.1|,NP_872271.1|,NP_001193725.1|,NP_001193726.1|,NP_001193728.1|
NTGIIC[320]TIGPASR (+2)	1	1621.82	1302.5	NP_002645.3|,NP_872270.1|,NP_872271.1|,NP_001193725.1|,NP_001193726.1|,NP_001193728.1|
DVIEEYFKC[320]K (+2)	1	1592.75	1273.45	NP_001007.2|
VPTANVSVVDLTC[320]R (+2)	1	1792.91	1473.69	NP_002037.2|,NP_001243728.1|
VQEKC[320]QLEINFNTLQTK (+3)	1	2355.19	2036.31	NP_004915.2|,NP_001093.1|,NP_001123476.1|,NP_001123477.1|,NP_001094.1|
LLC[320]GLLAER (+2)	1	1306.71	987.218	NP_002406.1|
SLHDALC[320]VLAQTVK (+2)	1	1816.95	1497.76	NP_001185771.1|,NP_006422.1|
KAAAPAPEEEMDEC[320]EQALAAEPK (+4)	1	2747.24	2428.65	NP_001395.1|
M[16]C[320]LFAGFQR (+2)	1	1407.64	1072.3	NP_004492.2|,NP_114032.2|
GVC[320]HIPM[16]AEPFC[57]PK (+3)	1	1920.87	1528.86	NP_002442.2|
FC[320]PFAER (+2)	1	1188.54	868.999	NP_004823.1|,NP_001177931.1|,NP_001177932.1|
KC[320]LEEQGLK (+2)	1	1366.69	1047.23	NP_001896.2|
NQSFC[320]PTVNLDK (+2)	1	1684.79	1365.51	NP_000981.1|
YSPNC[320]K (+2)	1	1030.45	710.799	NP_005557.1|,NP_001158886.1|,NP_001158887.1|,NP_001158888.1|
RYKC[320]NEC[320]GK (+2)	1	1739.79	1100.27	XP_496322.6|
AVLC[320]PPPVK (+3)	1	1242.68	923.174	NP_008839.2|,NP_061485.1|,NP_005043.1|
LC[320]QFHR (+3)	1	1122.54	802.944	NP_004716.1|,NP_001007794.1|
VDVFREDLC[320]TK (+3)	1	1643.8	1324.5	NP_788955.1|,NP_006254.1|
MMIGRC[320]NRAGK (+2)	1	1555.75	1236.53	NP_002645.3|,NP_872270.1|,NP_872271.1|,NP_001193725.1|,NP_001193726.1|,NP_001193727.1|,NP_001193728.1|
AQC[320]PIVER (+2)	1	1234.61	915.069	NP_001000.2|
KLYKC[320]EEC[320]GK (+2)	1	1839.86	1200.43	NP_003421.2|
AHVVPC[320]FDASK (+2)	1	1492.71	1173.34	NP_001447.2|,NP_001104026.1|
DVIEEYFKC[320]K (+3)	1	1592.75	1593.6	NP_001007.2|
TVAKC[320]QVTPR (+2)	1	1421.74	1422.46	NP_001193496.1|,NP_005522.2|
TATAVAHC[320]K (+2)	1	1220.6	1221.19	NP_001011.1|
AHEILPNLVC[320]C[57]SAK (+3)	1	1873.92	1497.78	NP_006576.2|
STLTDSLVC[320]K (+3)	1	1385.69	1386.38	NP_001952.1|
ISIC[320]SSDKR (+3)	1	1327.66	1008.15	NP_004955.2|
LEDEHLVFFC[320]QM[16]GK (+4)	1	2030.92	1695.96	NP_001106676.1|,NP_001106677.1|,NP_001106678.1|
VPTANVSVVDLTC[320]R (+3)	1	1792.91	1793.84	NP_002037.2|,NP_001243728.1|
FC[320]LDNGAK (+2)	1	1186.54	866.981	NP_000282.1|
VAHALAEGLGVIAC[320]IGEK (+4)	1	2070.09	1751.06	NP_001244955.1|,NP_000356.1|,NP_001152759.1|
NYLEPGKEC[320]VQPATK (+3)	1	1995.97	1676.89	NP_733765.1|
NM[16]SVHLSPC[320]FR (+3)	1	1625.74	1626.66	NP_001006.1|
LEDEHLVFFC[320]QMGK (+3)	1	2014.93	2016.1	NP_001106676.1|,NP_001106677.1|,NP_001106678.1|
AC[320]VMM[16]QGR (+2)	1	1230.53	895.125	NP_000261.2|
SC[320]QFVAVR (+2)	1	1228.6	909.064	NP_004437.2|
TGSQGQC[320]TQVR (+2)	1	1483.68	1484.4	NP_001022.1|
KC[320]SASNR (+3)	1	1084.51	764.851	NP_001015.1|
APQC[320]LGK (+2)	1	1035.52	715.862	NP_004492.2|,NP_114032.2|
NLVSLDISSKC[320]M[16]MEFSSIGK (+3)	1	2524.2	2189.57	XP_496322.6|
YSC[320]QEGDKFK (+2)	1	1523.67	1204.31	NP_005969.1|
APPC[320]EYKDWLTK (+3)	1	1769.84	1450.66	NP_008835.5|,NP_001075109.1|
IIYGGSVTGATC[320]K (+3)	1	1588.79	1269.47	NP_001244955.1|,NP_000356.1|,NP_001152759.1|
GIFPVLC[320]K (+2)	1	1195.64	876.117	NP_002645.3|,NP_872270.1|,NP_872271.1|,NP_001193725.1|,NP_001193726.1|,NP_001193727.1|,NP_001193728.1|
SAFLC[320]GVM[16]K (+3)	1	1290.61	955.196	NP_006363.4|,NP_001153148.1|,NP_001153147.1|,NP_001153146.1|,NP_001153149.1|,NP_005817.1|,NP_001095868.1|
HC[320]NMVLENVK (+3)	1	1505.71	1186.4	NP_004588.1|,NP_808210.2|
NC[320]LNPQFSK (+2)	1	1369.64	1050.19	NP_003900.1|
KFIAYC[320]RVKCGPR (+3)	1	1859.97	1540.9	NP_006730.2|
KLENC[320]NYAVELGK (+3)	1	1799.89	1800.83	NP_005023.2|,NP_001165806.1|,NP_001129497.1|,NP_002289.2|

## Sheet: Protein View
Accession	Cluster	Count	Coverage	Protein Group	Gene Id	Gene Name	Chromosome	Gene Family	Distinct Peptides	Distinct Matches	Filtered Spectra	Description	Modified Sites	Peptide Sequences
NP_002037.2|,NP_001243728.1|	190	2	55.3431	481	GAPDH	glyceraldehyde-3-phosphate dehydrogenase	12p13.31		2	4	20	|GAPDH|2597|P04406;E7EUT4|glyceraldehyde-3-phosphate dehydrogenase isoform 2 [Homo sapiens]	320@C152,320@C110,320@C247,320@C205	IISNASCTTNCLAPLAK,VPTANVSVVDLTCR
NP_002037.2|			51.6418		GAPDH	glyceraldehyde-3-phosphate dehydrogenase	12p13.31					|GAPDH|2597|P04406|glyceraldehyde-3-phosphate dehydrogenase isoform 1 [Homo sapiens]	320@C152,320@C247
NP_001243728.1|			59.0444		GAPDH	glyceraldehyde-3-phosphate dehydrogenase	12p13.31					|GAPDH|2597|P04406;E7EUT4|glyceraldehyde-3-phosphate dehydrogenase isoform 2 [Homo sapiens]	320@C110,320@C205
NP_002818.1|	270	1	5.05747	370	PTPN1	protein tyrosine phosphatase, non-receptor type 1	20q13.1-q13.2	PTPN	1	2	8	|PTPN1|5770|P18031;A8K3M3|tyrosine-protein phosphatase non-receptor type 1 [Homo sapiens]	320@C215	ESGSLSPEHGPVVVHCSAGIGR
NP_002147.2|,NP_955472.1|	353	2	43.8045	492	HSPD1	heat shock 60kDa protein 1 (chaperonin)	2q33.1	CHAP	2	3	7	|HSPD1|3329|P10809|60 kDa heat shock protein, mitochondrial [Homo sapiens]	320@C237,320@C442	GQKCEFQDAYVLLSEK,AAVEEGIVLGGGCALLR
NP_002147.2|			43.8045		HSPD1	heat shock 60kDa protein 1 (chaperonin)	2q33.1	CHAP				|HSPD1|3329|P10809|60 kDa heat shock protein, mitochondrial [Homo sapiens]	320@C237,320@C442
NP_955472.1|			43.8045		HSPD1	heat shock 60kDa protein 1 (chaperonin)	2q33.1	CHAP				|HSPD1|3329|P10809|60 kDa heat shock protein, mitochondrial [Homo sapiens]	320@C237,320@C442
NP_001393.1|	24	1	45.8874	31	EEF1A1	eukaryotic translation elongation factor 1 alpha 1	6q14.1		2	3	6	|EEF1A1|1915|P68104;Q6IPS9|elongation factor 1-alpha 1 [Homo sapiens]	320@C411,320@C234	SGDAAIVDMVPGKPMCVESFSDYPPLGR,DGNASGTTLLEALDCILPPTRPTDKPLR
NP_001036817.1|	153	1	29.5547	194	TPM3	tropomyosin 3	1q21.2	TPM	1	3	6	|TPM3|7170|P06753|tropomyosin alpha-3 chain isoform 3 [Homo sapiens]	320@C170	LMDQNLKCLSAAEEK
NP_705935.1|	153	1	33.871	195	TPM3	tropomyosin 3	1q21.2	TPM	1	3	6	|TPM3|7170|P06753|tropomyosin alpha-3 chain isoform 2 [Homo sapiens]	320@C170	LMDQNLKCLSAAEEK
NP_001015.1|	8	1	38.5542	9	RPS21	ribosomal protein S21	20q13.3	RPS	2	3	5	|RPS21|6227|P63220;Q6FGH5|40S ribosomal protein S21 [Homo sapiens]	320@C17,320@C56	KCSASNR,TYAICGAIR
NP_003791.3|	291	1	2.68007	405	RNGTT	RNA guanylyltransferase and 5'-phosphatase	6q16	DUSPA	1	2	5	|RNGTT|8732|O60942|mRNA-capping enzyme [Homo sapiens]	320@C126	NPPELIGVHCTHGFNR
NP_005498.1|	252	1	62.0482	502	CFL1	cofilin 1 (non-muscle)	11q13.1		2	3	5	|CFL1|1072|P23528|cofilin-1 [Homo sapiens]	320@C147,320@C139	DRCTLAEK,HELQANCYEEVKDR
NP_001952.1|	392	1	37.4126	548	EEF2	eukaryotic translation elongation factor 2	19p13.3		2	3	5	|EEF2|1938|P13639|elongation factor 2 [Homo sapiens]	320@C41,320@C67	STLTDSLVCK,KDEQERCITIK
NP_001447.2|,NP_001104026.1|	593	2	12.1832	865	FLNA	filamin A, alpha	Xq28		2	3	5	|FLNA|2316|P21333;Q60FE5;Q6NXF2|filamin-A isoform 2 [Homo sapiens]	320@C2535,320@C2543,320@C1157	ATCAPQHGAPGPGPADASK,AHVVPCFDASK
NP_001447.2|			12.2016		FLNA	filamin A, alpha	Xq28					|FLNA|2316|P21333;Q60FE5;Q6NXF2|filamin-A isoform 1 [Homo sapiens]	320@C1157,320@C2535
NP_001104026.1|			12.1647		FLNA	filamin A, alpha	Xq28					|FLNA|2316|P21333;Q60FE5;Q6NXF2|filamin-A isoform 2 [Homo sapiens]	320@C1157,320@C2543
NP_000997.1|	119	1	43.5606	153	RPS3A	ribosomal protein S3A	4q31.2-q31.3	RPS	2	2	4	|RPS3A|6189|P61247|40S ribosomal protein S3a isoform 1 [Homo sapiens]	320@C96,320@C201	NCLTNFHGMDLTR,ACQSIYPLHDVFVR
NP_001188412.1|	156	1	26.6862	200	ENO1	enolase 1, (alpha)	1p36.2		2	2	4	|ENO1|2023|P06733;E2DRY6|c-myc promoter-binding protein-1 isoform MBP-1 [Homo sapiens]	320@C306,320@C264	TGAPCR,VNQIGSVTESLQACK
NP_006077.2|	161	1	29.3333	210	TUBB3	tubulin, beta 3 class III	16q24.3	TUB	1	1	4	|TUBB3|10381|Q13509;Q53G92|tubulin beta-3 chain isoform 1 [Homo sapiens]	320@C12	EIVHIQAGQCGNQIGAK
NP_821080.1|,NP_001060.1|	161	2	34.8315	211	TUBB2A	tubulin, beta 2A class IIa	6p25.2	TUB	1	1	4	|TUBB2A|7280|Q13885|tubulin beta-2A chain [Homo sapiens]	320@C12	EIVHIQAGQCGNQIGAK
NP_821080.1|			34.8315		TUBB2B	tubulin, beta 2B class IIb	6p25.2	TUB				|TUBB2B|347733|Q9BVA1|tubulin beta-2B chain [Homo sapiens]	320@C12
NP_001060.1|			34.8315		TUBB2A	tubulin, beta 2A class IIa	6p25.2	TUB				|TUBB2A|7280|Q13885|tubulin beta-2A chain [Homo sapiens]	320@C12
NP_821133.1|	161	1	51.8018	212	TUBB	tubulin, beta class I	6p21.33	TUB	1	1	4	|TUBB|203068|P07437;Q5SU16|tubulin beta chain [Homo sapiens]	320@C12	EIVHIQAGQCGNQIGAK
NP_004081.1|	210	1	3.24324	273	DUSP3	dual specificity phosphatase 3	17q21	DUSPA	1	1	4	|DUSP3|1845|P51452|dual specificity protein phosphatase 3 [Homo sapiens]	320@C124	VLVHCR
NP_001244955.1|	222	1	81.4371	294	TPI1	triosephosphate isomerase 1	12p13.31		2	3	4	|TPI1|7167|B7Z5D8|triosephosphate isomerase isoform 3 [Homo sapiens]	320@C45,320@C136	VAHALAEGLGVIACIGEK,IIYGGSVTGATCK
NP_002645.3|	48	1	55.1789	334	PKM	pyruvate kinase, muscle	15q23		3	4	4	|PKM|5315|P14618|pyruvate kinase isozymes M1/M2 isoform a [Homo sapiens]	320@C49,320@C317,320@C474	NTGIICTIGPASR,MMIGRCNRAGK,GIFPVLCK
NP_872270.1|,NP_872271.1|,NP_001193725.1|,NP_001193728.1|	48	4	46.4421	335	PKM	pyruvate kinase, muscle	15q23		3	4	4	|PKM|5315|P14618|pyruvate kinase isozymes M1/M2 isoform f [Homo sapiens]	320@C49,320@C123,320@C54,320@C317,320@C391,320@C322,320@C474,320@C548,320@C479	NTGIICTIGPASR,MMIGRCNRAGK,GIFPVLCK
NP_872270.1|			48.0226		PKM	pyruvate kinase, muscle	15q23					|PKM|5315|P14618|pyruvate kinase isozymes M1/M2 isoform b [Homo sapiens]	320@C49,320@C317,320@C474
NP_872271.1|			48.0226		PKM	pyruvate kinase, muscle	15q23					|PKM|5315|P14618|pyruvate kinase isozymes M1/M2 isoform b [Homo sapiens]	320@C49,320@C317,320@C474
NP_001193725.1|			42.1488		PKM	pyruvate kinase, muscle	15q23					|PKM|5315|P14618|pyruvate kinase isozymes M1/M2 isoform c [Homo sapiens]	320@C123,320@C391,320@C548
NP_001193728.1|			47.5746		PKM	pyruvate kinase, muscle	15q23					|PKM|5315|P14618|pyruvate kinase isozymes M1/M2 isoform f [Homo sapiens]	320@C54,320@C322,320@C479
NP_001193726.1|	48	1	49.453	336	PKM	pyruvate kinase, muscle	15q23		3	4	4	|PKM|5315|P14618;B4DNK4|pyruvate kinase isozymes M1/M2 isoform d [Homo sapiens]	320@C49,320@C243,320@C400	NTGIICTIGPASR,MMIGRCNRAGK,GIFPVLCK
NP_000356.1|,NP_001152759.1|	222	2	69.4913	379	TPI1	triosephosphate isomerase 1	12p13.31		2	3	4	|TPI1|7167|P60174|triosephosphate isomerase isoform 2 [Homo sapiens]	320@C127,320@C164,320@C218,320@C255	VAHALAEGLGVIACIGEK,IIYGGSVTGATCK
NP_000356.1|			74.2972		TPI1	triosephosphate isomerase 1	12p13.31					|TPI1|7167|P60174;Q53HE2|triosephosphate isomerase isoform 1 [Homo sapiens]	320@C127,320@C218
NP_001152759.1|			64.6853		TPI1	triosephosphate isomerase 1	12p13.31					|TPI1|7167|P60174|triosephosphate isomerase isoform 2 [Homo sapiens]	320@C164,320@C255
NP_002825.3|	315	1	3.37268	432	PTPN11	protein tyrosine phosphatase, non-receptor type 11	12q24.1	SH2D	1	2	4	|PTPN11|5781|Q06124|tyrosine-protein phosphatase non-receptor type 11 isoform 1 [Homo sapiens]	320@C459	QESIMDAGPVVVHCSAGIGR
NP_000980.1|	317	1	33.913	434	RPL30	ribosomal protein L30	8q22	RPL	1	2	4	|RPL30|6156|P62888|60S ribosomal protein L30 [Homo sapiens]	320@C52	LVILANNCPALR
NP_002823.3|,NP_542155.1|,NP_001186726.1|	322	3	6.49689	440	PTPN7	protein tyrosine phosphatase, non-receptor type 7	1q32.1	PTPN	1	2	4	|PTPN7|5778|B4DZD9|tyrosine-protein phosphatase non-receptor type 7 isoform 3 [Homo sapiens]	320@C396,320@C330,320@C365	LVAEVEESPETAAHPGPIVVHCSAGIGR
NP_002823.3|			6.02151		PTPN7	protein tyrosine phosphatase, non-receptor type 7	1q32.1	PTPN				|PTPN7|5778|Q5SXQ0|tyrosine-protein phosphatase non-receptor type 7 isoform 1 [Homo sapiens]	320@C396
NP_542155.1|			7.01754		PTPN7	protein tyrosine phosphatase, non-receptor type 7	1q32.1	PTPN				|PTPN7|5778|P35236|tyrosine-protein phosphatase non-receptor type 7 isoform 2 [Homo sapiens]	320@C330
NP_001186726.1|			6.45161		PTPN7	protein tyrosine phosphatase, non-receptor type 7	1q32.1	PTPN				|PTPN7|5778|B4DZD9|tyrosine-protein phosphatase non-receptor type 7 isoform 3 [Homo sapiens]	320@C365
NP_001106676.1|,NP_001106677.1|,NP_001106678.1|	334	3	14.6456	456	TSTD1	thiosulfate sulfurtransferase (rhodanese)-like domain containing 1	1q23.3		1	3	4	|TSTD1|100131187|Q8NFU3|thiosulfate sulfurtransferase/rhodanese-like domain-containing protein 1 isoform 1 [Homo sapiens]	320@C79,320@C38	LEDEHLVFFCQMGK
NP_001106676.1|			12.844		TSTD1	thiosulfate sulfurtransferase (rhodanese)-like domain containing 1	1q23.3					|TSTD1|100131187|Q8NFU3|thiosulfate sulfurtransferase/rhodanese-like domain-containing protein 1 isoform 3 [Homo sapiens]	320@C79
NP_001106677.1|			18.9189		TSTD1	thiosulfate sulfurtransferase (rhodanese)-like domain containing 1	1q23.3					|TSTD1|100131187|Q8NFU3|thiosulfate sulfurtransferase/rhodanese-like domain-containing protein 1 isoform 2 [Homo sapiens]	320@C38
NP_001106678.1|			12.1739		TSTD1	thiosulfate sulfurtransferase (rhodanese)-like domain containing 1	1q23.3					|TSTD1|100131187|Q8NFU3|thiosulfate sulfurtransferase/rhodanese-like domain-containing protein 1 isoform 1 [Homo sapiens]	320@C79
NP_055140.1|	408	1	14.557	568	CORO1C	coronin, actin binding protein, 1C	12q24.1	WDR	1	1	4	|CORO1C|23603|Q9ULV4|coronin-1C isoform 1 [Homo sapiens]	320@C420	KCDLISIPK
NP_112604.2|,NP_004491.2|,NP_001070910.1|,NP_001070911.1|	111	4	21.379	581	HNRNPC	heterogeneous nuclear ribonucleoprotein C (C1/C2)	14q11.2	RBM	1	2	4	|HNRNPC|3183|P07910|heterogeneous nuclear ribonucleoproteins C1/C2 isoform b [Homo sapiens]	320@C46	IVGCSVHK
NP_112604.2|			20.915		HNRNPC	heterogeneous nuclear ribonucleoprotein C (C1/C2)	14q11.2	RBM				|HNRNPC|3183|P07910|heterogeneous nuclear ribonucleoproteins C1/C2 isoform a [Homo sapiens]	320@C46
NP_004491.2|			21.843		HNRNPC	heterogeneous nuclear ribonucleoprotein C (C1/C2)	14q11.2	RBM				|HNRNPC|3183|P07910|heterogeneous nuclear ribonucleoproteins C1/C2 isoform b [Homo sapiens]	320@C46
NP_001070910.1|			20.915		HNRNPC	heterogeneous nuclear ribonucleoprotein C (C1/C2)	14q11.2	RBM				|HNRNPC|3183|P07910|heterogeneous nuclear ribonucleoproteins C1/C2 isoform a [Homo sapiens]	320@C46
NP_001070911.1|			21.843		HNRNPC	heterogeneous nuclear ribonucleoprotein C (C1/C2)	14q11.2	RBM				|HNRNPC|3183|P07910|heterogeneous nuclear ribonucleoproteins C1/C2 isoform b [Homo sapiens]	320@C46
NP_776247.3|,NP_001093861.1|,NP_001093862.1|,NP_001093863.1|	111	4	5.09953	582	RALYL	RALY RNA binding protein-like	8q21.2	RBM	1	2	4	|RALYL|138046|Q86SE5;B3KSX3|RNA-binding Raly-like protein isoform 2 [Homo sapiens]	320@C51,320@C64	IVGCSVHK
NP_776247.3|			5.15464		RALYL	RALY RNA binding protein-like	8q21.2	RBM				|RALYL|138046|Q86SE5;B3KT61|RNA-binding Raly-like protein isoform 2 [Homo sapiens]	320@C51
NP_001093861.1|			4.93421		RALYL	RALY RNA binding protein-like	8q21.2	RBM				|RALYL|138046|Q86SE5;G3V129|RNA-binding Raly-like protein isoform 1 [Homo sapiens]	320@C64
NP_001093862.1|			5.15464		RALYL	RALY RNA binding protein-like	8q21.2	RBM				|RALYL|138046|Q86SE5|RNA-binding Raly-like protein isoform 2 [Homo sapiens]	320@C51
NP_001093863.1|			5.15464		RALYL	RALY RNA binding protein-like	8q21.2	RBM				|RALYL|138046|Q86SE5;B3KSX3|RNA-binding Raly-like protein isoform 2 [Homo sapiens]	320@C51
NP_001419.1|	156	1	32.9493	715	ENO1	enolase 1, (alpha)	1p36.2		2	2	4	|ENO1|2023|P06733|alpha-enolase isoform 1 [Homo sapiens]	320@C399,320@C357	TGAPCR,VNQIGSVTESLQACK
NP_001185771.1|,NP_006422.1|	66	2	15.4774	83	CCT2	chaperonin containing TCP1, subunit 2 (beta)	12q14	CHAP	1	2	3	|CCT2|10576|P78371|T-complex protein 1 subunit beta isoform 1 [Homo sapiens]	320@C348,320@C395	SLHDALCVLAQTVK
NP_001185771.1|			16.1885		CCT2	chaperonin containing TCP1, subunit 2 (beta)	12q14	CHAP				|CCT2|10576|P78371|T-complex protein 1 subunit beta isoform 2 [Homo sapiens]	320@C348
NP_006422.1|			14.7664		CCT2	chaperonin containing TCP1, subunit 2 (beta)	12q14	CHAP				|CCT2|10576|P78371|T-complex protein 1 subunit beta isoform 1 [Homo sapiens]	320@C395
NP_002464.1|	27	1	12.6531	139	MYH9	myosin, heavy chain 9, non-muscle	22q13.1	MYHII	2	2	3	|MYH9|4627|P35579;Q60FE2|myosin-9 [Homo sapiens]	320@C1379,320@C671	KMEDSVGCLETAEEVK,CIIPNHEK
NP_006079.1|	161	1	51.6854	208	TUBB4B	tubulin, beta 4B class IVb	9q34.3	TUB	1	1	3	|TUBB4B|10383|P68371|tubulin beta-4B chain [Homo sapiens]	320@C12	EIVHLQAGQCGNQIGAK
NP_006078.2|	161	1	35.8108	209	TUBB4A	tubulin, beta 4A class IVa	19p13.3	TUB	1	1	3	|TUBB4A|10382|P04350|tubulin beta-4A chain [Homo sapiens]	320@C12	EIVHLQAGQCGNQIGAK
NP_001395.1|	241	1	21.0526	316	EEF1G	eukaryotic translation elongation factor 1 gamma	11q12.3		1	2	3	|EEF1G|1937|P26641;Q53YD7|elongation factor 1-gamma [Homo sapiens]	320@C266	KAAAPAPEEEMDECEQALAAEPK
NP_005013.1|	263	1	75	358	PFN1	profilin 1	17p13.2		1	1	3	|PFN1|5216|P07737;Q53Y44|profilin-1 [Homo sapiens]	320@C128	KCYEMASHLR
NP_008839.2|,NP_061485.1|,NP_005043.1|	313	3	4.5468	430	RAC3	ras-related C3 botulinum toxin substrate 3 (rho family, small GTP binding protein Rac3)	17q25.3	ENDOLIG	1	2	3	|RAC3|5881|P60763|ras-related C3 botulinum toxin substrate 3 [Homo sapiens]	320@C178,320@C197	AVLCPPPVK
NP_008839.2|			4.6875		RAC1	ras-related C3 botulinum toxin substrate 1 (rho family, small GTP binding protein Rac1)	7p22	ENDOLIG				|RAC1|5879|P63000;A4D2P1|ras-related C3 botulinum toxin substrate 1 isoform Rac1 [Homo sapiens]	320@C178
NP_061485.1|			4.2654		RAC1	ras-related C3 botulinum toxin substrate 1 (rho family, small GTP binding protein Rac1)	7p22	ENDOLIG				|RAC1|5879|P63000;A4D2P0|ras-related C3 botulinum toxin substrate 1 isoform Rac1b [Homo sapiens]	320@C197
NP_005043.1|			4.6875		RAC3	ras-related C3 botulinum toxin substrate 3 (rho family, small GTP binding protein Rac3)	17q25.3	ENDOLIG				|RAC3|5881|P60763|ras-related C3 botulinum toxin substrate 3 [Homo sapiens]	320@C178
NP_001193496.1|,NP_005522.2|	398	2	3.56653	556	IFI16	interferon, gamma-inducible protein 16	1q22		1	2	3	|IFI16|3428|Q16666|gamma-interferon-inducible protein 16 isoform 2 [Homo sapiens]	320@C135,320@C191	TVAKCQVTPR
NP_001193496.1|			3.56653		IFI16	interferon, gamma-inducible protein 16	1q22					|IFI16|3428|Q16666;B4DJT8;H3BLV7|gamma-interferon-inducible protein 16 isoform 1 [Homo sapiens]	320@C135
NP_005522.2|			3.56653		IFI16	interferon, gamma-inducible protein 16	1q22					|IFI16|3428|Q16666|gamma-interferon-inducible protein 16 isoform 2 [Homo sapiens]	320@C191
NP_003900.1|	401	1	6.14525	559	CPNE3	copine III	8q21		2	2	3	|CPNE3|8895|O75131;Q05DL8|copine-3 [Homo sapiens]	320@C54	IKNCLNPQFSK,NCLNPQFSK
NP_005969.1|	311	1	40.2062	620	S100A2	S100 calcium binding protein A2	1q21	S100	1	2	3	|S100A2|6273|P29034|protein S100-A2 [Homo sapiens]	320@C21	YSCQEGDKFK
NP_001177411.1|,NP_006191.2|	486	2	0.979755	675	PCSK5	proprotein convertase subtilisin/kexin type 5	9q21.13		1	1	3	|PCSK5|5125|Q92824|proprotein convertase subtilisin/kexin type 5 isoform 2 preproprotein [Homo sapiens]	320@C737,320@C740	KNLCRKCSENCK
NP_001177411.1|			0.645161		PCSK5	proprotein convertase subtilisin/kexin type 5	9q21.13					|PCSK5|5125|Q92824|proprotein convertase subtilisin/kexin type 5 isoform 1 preproprotein [Homo sapiens]	320@C737,320@C740
NP_006191.2|			1.31435		PCSK5	proprotein convertase subtilisin/kexin type 5	9q21.13					|PCSK5|5125|Q92824|proprotein convertase subtilisin/kexin type 5 isoform 2 preproprotein [Homo sapiens]	320@C737,320@C740
NP_004437.2|	537	1	4.82804	769	EPRS	glutamyl-prolyl-tRNA synthetase	1q41	aaRS2	2	2	3	|EPRS|2058|P07814|bifunctional glutamate/proline--tRNA ligase [Homo sapiens]	320@C744,320@C1377	ERPTPSLNNNCTTSEDSLVLYNR,SCQFVAVR
NP_006730.2|	552	1	3.95095	790	MCM5	minichromosome maintenance complex component 5	22q13.1-q13.2		1	2	3	|MCM5|4174|P33992;B1AHB0|DNA replication licensing factor MCM5 [Homo sapiens]	320@C566	KFIAYCRVKCGPR
NP_001242941.1|,NP_005955.3|,NP_001243024.1|	27	3	1.86	35	MYH10	myosin, heavy chain 10, non-muscle	17p13	MYHII	1	1	2	|MYH10|4628|B2RWP9;Q4LE45|myosin-10 isoform 3 [Homo sapiens]	320@C709,320@C678,320@C687	CIIPNHEK
NP_001242941.1|			1.84355		MYH10	myosin, heavy chain 10, non-muscle	17p13	MYHII				|MYH10|4628|P35580;F8VTL3;G1UI33;Q4LE45;Q9BWG0|myosin-10 isoform 1 [Homo sapiens]	320@C709
NP_005955.3|			1.87247		MYH10	myosin, heavy chain 10, non-muscle	17p13	MYHII				|MYH10|4628|P35580;B2RWP9;Q9BWG0|myosin-10 isoform 2 [Homo sapiens]	320@C678
NP_001243024.1|			1.86398		MYH10	myosin, heavy chain 10, non-muscle	17p13	MYHII				|MYH10|4628|B2RWP9;Q4LE45|myosin-10 isoform 3 [Homo sapiens]	320@C687
NP_001193727.1|	48	1	45.7364	61	PKM	pyruvate kinase, muscle	15q23		2	2	2	|PKM|5315|P14618|pyruvate kinase isozymes M1/M2 isoform e [Homo sapiens]	320@C302,320@C459	MMIGRCNRAGK,GIFPVLCK
NP_001129064.1|,NP_002945.1|,NP_001170884.1|	87	3	42.3077	108	RPS27A	ribosomal protein S27a	2p16	RPS	1	1	2	|RPS27A|6233|P62979;B2RDW1|ubiquitin-40S ribosomal protein S27a precursor [Homo sapiens]	320@C149	CCLTYCFNKPEDK
NP_001129064.1|			42.3077		RPS27A	ribosomal protein S27a	2p16	RPS				|RPS27A|6233|P62979;B2RDW1|ubiquitin-40S ribosomal protein S27a precursor [Homo sapiens]	320@C149
NP_002945.1|			42.3077		RPS27A	ribosomal protein S27a	2p16	RPS				|RPS27A|6233|P62979;B2RDW1|ubiquitin-40S ribosomal protein S27a precursor [Homo sapiens]	320@C149
NP_001170884.1|			42.3077		RPS27A	ribosomal protein S27a	2p16	RPS				|RPS27A|6233|P62979;B2RDW1|ubiquitin-40S ribosomal protein S27a precursor [Homo sapiens]	320@C149
NP_006635.2|	104	1	3.14685	134	HSPH1	heat shock 105kDa/110kDa protein 1	13q12.2-q13.3	HSP70	1	1	2	|HSPH1|10808|Q92598|heat shock protein 105 kDa [Homo sapiens]	320@C658	FICEQDHQNFLR
NP_001007.2|	139	1	21.9697	176	RPS12	ribosomal protein S12	6q23	RPS	1	2	2	|RPS12|6206|P25398|40S ribosomal protein S12 [Homo sapiens]	320@C130	DVIEEYFKCK
NP_001014.1|,NP_001139699.1|	168	2	20.8516	219	RPS20	ribosomal protein S20	8q12.1	RPS	1	1	2	|RPS20|6224|P60866|40S ribosomal protein S20 isoform 1 [Homo sapiens]	320@C70	KTPCGEGSK
NP_001014.1|			22.6891		RPS20	ribosomal protein S20	8q12.1	RPS				|RPS20|6224|P60866|40S ribosomal protein S20 isoform 2 [Homo sapiens]	320@C70
NP_001139699.1|			19.0141		RPS20	ribosomal protein S20	8q12.1	RPS				|RPS20|6224|P60866|40S ribosomal protein S20 isoform 1 [Homo sapiens]	320@C70
NP_001138882.1|	219	1	16.7539	333	NONO	non-POU domain containing, octamer-binding	Xq13.1	RBM	1	1	2	|NONO|4841|Q15233;B7Z4C2;F5GYZ3|non-POU domain-containing octamer-binding protein isoform 2 [Homo sapiens]	320@C56	FACHSASLTVR
NP_058625.2|,NP_001242952.1|,NP_001107558.1|,NP_444507.1|	287	4	2.87074	395	CLIC6	chloride intracellular channel 6	21q22.12	CLIC	1	1	2	|CLIC6|54102|Q96NY7|chloride intracellular channel protein 6 [Homo sapiens]	320@C32,320@C191,320@C469	IGNCPFSQR
NP_058625.2|			3.58566		CLIC5	chloride intracellular channel 5	6p12.3	CLIC				|CLIC5|53405|Q9NZA1;Q53G01|chloride intracellular channel protein 5 isoform b [Homo sapiens]	320@C32
NP_001242952.1|			4.39024		CLIC5	chloride intracellular channel 5	6p12.3	CLIC				|CLIC5|53405|Q49AE1;Q8NBY3|chloride intracellular channel protein 5 isoform c [Homo sapiens]	320@C32
NP_001107558.1|			2.19512		CLIC5	chloride intracellular channel 5	6p12.3	CLIC				|CLIC5|53405|Q9NZA1;Q53G01|chloride intracellular channel protein 5 isoform a [Homo sapiens]	320@C191
NP_444507.1|			1.31195		CLIC6	chloride intracellular channel 6	21q22.12	CLIC				|CLIC6|54102|Q96NY7|chloride intracellular channel protein 6 [Homo sapiens]	320@C469
NP_039234.1|	287	1	6.71937	396	CLIC4	chloride intracellular channel 4	1p	CLIC	1	1	2	|CLIC4|25932|Q9Y696;Q6FIC5|chloride intracellular channel protein 4 [Homo sapiens]	320@C35	IGNCPFSQR
NP_001279.2|	287	1	18.2573	397	CLIC1	chloride intracellular channel 1	6p21.3	CLIC	1	1	2	|CLIC1|1192|O00299;Q5SRT3|chloride intracellular channel protein 1 [Homo sapiens]	320@C24	IGNCPFSQR
NP_000966.2|,NP_001186731.1|	306	2	17.4649	421	RPL11	ribosomal protein L11	1p36.1-p35	RPL	1	1	2	|RPL11|6135|P62913|60S ribosomal protein L11 isoform 2 [Homo sapiens]	320@C72,320@C71	IAVHCTVR
NP_000966.2|			17.4157		RPL11	ribosomal protein L11	1p36.1-p35	RPL				|RPL11|6135|P62913;Q5VVD0|60S ribosomal protein L11 isoform 1 [Homo sapiens]	320@C72
NP_001186731.1|			17.5141		RPL11	ribosomal protein L11	1p36.1-p35	RPL				|RPL11|6135|P62913|60S ribosomal protein L11 isoform 2 [Homo sapiens]	320@C71
NP_002366.2|,NP_001127836.1|	308	2	4.63515	423	MAP4	microtubule-associated protein 4	3p21		1	1	2	|MAP4|4134|P27816|microtubule-associated protein 4 isoform 4 [Homo sapiens]	320@C635	KCSLPAEEDSVLEK
NP_002366.2|			4.60069		MAP4	microtubule-associated protein 4	3p21					|MAP4|4134|P27816|microtubule-associated protein 4 isoform 1 [Homo sapiens]	320@C635
NP_001127836.1|			4.6696		MAP4	microtubule-associated protein 4	3p21					|MAP4|4134|P27816|microtubule-associated protein 4 isoform 4 [Homo sapiens]	320@C635
NP_060293.2|	320	1	9.33333	437	DUSP23	dual specificity phosphatase 23	1q23.1	DUSPA	1	1	2	|DUSP23|54935|Q9BVJ7|dual specificity protein phosphatase 23 [Homo sapiens]	320@C95	GEAVGVHCALGFGR
NP_001032583.1|,NP_001032584.1|,NP_003737.1|,NP_542408.1|	326	4	24.7191	445	DYNLL2	dynein, light chain, LC8-type 2	17q23.2	DYN	1	1	2	|DYNLL2|140735|Q96FJ2|dynein light chain 2, cytoplasmic [Homo sapiens]	320@C56	YNPTWHCIVGR
NP_001032583.1|			24.7191		DYNLL1	dynein, light chain, LC8-type 1	12q24.23	DYN				|DYNLL1|8655|P63167;Q6FGH9|dynein light chain 1, cytoplasmic [Homo sapiens]	320@C56
NP_001032584.1|			24.7191		DYNLL1	dynein, light chain, LC8-type 1	12q24.23	DYN				|DYNLL1|8655|P63167;Q6FGH9|dynein light chain 1, cytoplasmic [Homo sapiens]	320@C56
NP_003737.1|			24.7191		DYNLL1	dynein, light chain, LC8-type 1	12q24.23	DYN				|DYNLL1|8655|P63167;Q6FGH9|dynein light chain 1, cytoplasmic [Homo sapiens]	320@C56
NP_542408.1|			24.7191		DYNLL2	dynein, light chain, LC8-type 2	17q23.2	DYN				|DYNLL2|140735|Q96FJ2|dynein light chain 2, cytoplasmic [Homo sapiens]	320@C56
NP_694881.1|	95	1	60.8519	475	HSPA8	heat shock 70kDa protein 8	11q24.1	HSP70	1	1	2	|HSPA8|3312|P11142;Q53HF2|heat shock cognate 71 kDa protein isoform 2 [Homo sapiens]	320@C17	GPAVGIDLGTTYSCVGVFQHGK
NP_006588.1|	95	1	54.644	476	HSPA8	heat shock 70kDa protein 8	11q24.1	HSP70	1	1	2	|HSPA8|3312|P11142;Q53HF2|heat shock cognate 71 kDa protein isoform 1 [Homo sapiens]	320@C17	GPAVGIDLGTTYSCVGVFQHGK
NP_002128.1|,NP_112533.1|	134	2	46.6998	485	HNRNPA2B1	heterogeneous nuclear ribonucleoprotein A2/B1	7p15	RBM	1	1	2	|HNRNPA2B1|3181|P22626|heterogeneous nuclear ribonucleoproteins A2/B1 isoform B1 [Homo sapiens]	320@C38,320@C50	LTDCVVMRDPASK
NP_002128.1|			47.5073		HNRNPA2B1	heterogeneous nuclear ribonucleoprotein A2/B1	7p15	RBM				|HNRNPA2B1|3181|P22626|heterogeneous nuclear ribonucleoproteins A2/B1 isoform A2 [Homo sapiens]	320@C38
NP_112533.1|			45.8924		HNRNPA2B1	heterogeneous nuclear ribonucleoprotein A2/B1	7p15	RBM				|HNRNPA2B1|3181|P22626|heterogeneous nuclear ribonucleoproteins A2/B1 isoform B1 [Homo sapiens]	320@C50
NP_001230106.1|,NP_000025.1|,NP_908930.1|,NP_908932.1|,NP_001121089.1|	371	5	58.3427	515	ALDOA	aldolase A, fructose-bisphosphate	16p11.2		1	1	2	|ALDOA|226|P04075|fructose-bisphosphate aldolase A isoform 1 [Homo sapiens]	320@C256,320@C202	RCQYVTEK
NP_001230106.1|			52.1531		ALDOA	aldolase A, fructose-bisphosphate	16p11.2					|ALDOA|226|P04075|fructose-bisphosphate aldolase A isoform 2 [Homo sapiens]	320@C256
NP_000025.1|			59.8901		ALDOA	aldolase A, fructose-bisphosphate	16p11.2					|ALDOA|226|P04075|fructose-bisphosphate aldolase A isoform 1 [Homo sapiens]	320@C202
NP_908930.1|			59.8901		ALDOA	aldolase A, fructose-bisphosphate	16p11.2					|ALDOA|226|P04075|fructose-bisphosphate aldolase A isoform 1 [Homo sapiens]	320@C202
NP_908932.1|			59.8901		ALDOA	aldolase A, fructose-bisphosphate	16p11.2					|ALDOA|226|P04075|fructose-bisphosphate aldolase A isoform 1 [Homo sapiens]	320@C202
NP_001121089.1|			59.8901		ALDOA	aldolase A, fructose-bisphosphate	16p11.2					|ALDOA|226|P04075|fructose-bisphosphate aldolase A isoform 1 [Homo sapiens]	320@C202
NP_000652.2|,NP_001020092.1|	394	2	29.6875	550	RPL9	ribosomal protein L9	4p13	RPL	1	1	2	|RPL9|6133|P32969;Q53Z07|60S ribosomal protein L9 [Homo sapiens]	320@C134	MRPGVACSVSQAQK
NP_000652.2|			29.6875		RPL9	ribosomal protein L9	4p13	RPL				|RPL9|6133|P32969;Q53Z07|60S ribosomal protein L9 [Homo sapiens]	320@C134
NP_001020092.1|			29.6875		RPL9	ribosomal protein L9	4p13	RPL				|RPL9|6133|P32969;Q53Z07|60S ribosomal protein L9 [Homo sapiens]	320@C134
NP_060697.4|	396	1	1.42586	553	UBA6	ubiquitin-like modifier activating enzyme 6	4q13.2	UBE1	1	1	2	|UBA6|55236|A0AVT1|ubiquitin-like modifier-activating enzyme 6 [Homo sapiens]	320@C347	KPNVGCQQDSEELLK
NP_000985.1|,NP_001007074.1|,NP_001007075.1|	407	3	25.9259	567	RPL32	ribosomal protein L32	3q13.3-q21	RPL	1	1	2	|RPL32|6161|P62910|60S ribosomal protein L32 [Homo sapiens]	320@C96	SYCAEIAHNVSSK
NP_000985.1|			25.9259		RPL32	ribosomal protein L32	3q13.3-q21	RPL				|RPL32|6161|P62910|60S ribosomal protein L32 [Homo sapiens]	320@C96
NP_001007074.1|			25.9259		RPL32	ribosomal protein L32	3q13.3-q21	RPL				|RPL32|6161|P62910|60S ribosomal protein L32 [Homo sapiens]	320@C96
NP_001007075.1|			25.9259		RPL32	ribosomal protein L32	3q13.3-q21	RPL				|RPL32|6161|P62910|60S ribosomal protein L32 [Homo sapiens]	320@C96
XXX_NP_110451.1|	427	1		595	Unmapped_XXX_NP_110451.1|				1	1	2			KCTKCEYPK
NP_689611.1|	434	1	8.08081	604	OCIAD2	OCIA domain containing 2	4p12		1	1	2	|OCIAD2|132299|Q56VL3|OCIA domain-containing protein 2 isoform 2 [Homo sapiens]	320@C27	QSLLFCPK
NP_001014446.1|	434	1	18.1818	605	OCIAD2	OCIA domain containing 2	4p12		1	1	2	|OCIAD2|132299|Q56VL3|OCIA domain-containing protein 2 isoform 1 [Homo sapiens]	320@C27	QSLLFCPK
NP_001076783.1|	467	1	2.91667	655	CHMP1A	charged multivesicular body protein 1A	16q24.3	CHMP	1	1	2	|CHMP1A|5119|A6NG32|charged multivesicular body protein 1a isoform 1 [Homo sapiens]	320@C196	CAPPLPR
NP_031389.3|,NP_001138880.1|,NP_001138881.1|	219	3	16.1359	686	NONO	non-POU domain containing, octamer-binding	Xq13.1	RBM	1	1	2	|NONO|4841|Q15233|non-POU domain-containing octamer-binding protein isoform 1 [Homo sapiens]	320@C145	FACHSASLTVR
NP_031389.3|			16.1359		NONO	non-POU domain containing, octamer-binding	Xq13.1	RBM				|NONO|4841|Q15233|non-POU domain-containing octamer-binding protein isoform 1 [Homo sapiens]	320@C145
NP_001138880.1|			16.1359		NONO	non-POU domain containing, octamer-binding	Xq13.1	RBM				|NONO|4841|Q15233|non-POU domain-containing octamer-binding protein isoform 1 [Homo sapiens]	320@C145
NP_001138881.1|			16.1359		NONO	non-POU domain containing, octamer-binding	Xq13.1	RBM				|NONO|4841|Q15233|non-POU domain-containing octamer-binding protein isoform 1 [Homo sapiens]	320@C145
NP_005943.1|,NP_005942.1|,NP_005941.1|,NP_005944.1|,NP_005937.2|	503	5	13.1148	706	MT1A	metallothionein 1A	16q13	MT	1	1	2	|MT1A|4489|P04731|metallothionein-1A [Homo sapiens]	320@C50	CAQGCICK
NP_005943.1|			13.1148		MT1X	metallothionein 1X	16q13	MT				|MT1X|4501|P80297|metallothionein-1X [Homo sapiens]	320@C50
NP_005942.1|			13.1148		MT1H	metallothionein 1H	16q13	MT				|MT1H|4496|P80294|metallothionein-1H [Homo sapiens]	320@C50
NP_005941.1|			13.1148		MT1G	metallothionein 1G	16q13	MT				|MT1G|4495|P13640|metallothionein-1G [Homo sapiens]	320@C50
NP_005944.1|			13.1148		MT2A	metallothionein 2A	16q13	MT				|MT2A|4502|P02795|metallothionein-2 [Homo sapiens]	320@C50
NP_005937.2|			13.1148		MT1A	metallothionein 1A	16q13	MT				|MT1A|4489|P04731|metallothionein-1A [Homo sapiens]	320@C50
NP_004492.2|,NP_114032.2|	167	2	21.4621	707	HNRNPU	heterogeneous nuclear ribonucleoprotein U (scaffold attachment factor A)	1q44		2	2	2	|HNRNPU|3192|Q00839;Q96BA7|heterogeneous nuclear ribonucleoprotein U isoform a [Homo sapiens]	320@C575,320@C594,320@C543,320@C562	MCLFAGFQR,APQCLGK
NP_004492.2|			21.7122		HNRNPU	heterogeneous nuclear ribonucleoprotein U (scaffold attachment factor A)	1q44					|HNRNPU|3192|Q00839|heterogeneous nuclear ribonucleoprotein U isoform b [Homo sapiens]	320@C543,320@C575
NP_114032.2|			21.2121		HNRNPU	heterogeneous nuclear ribonucleoprotein U (scaffold attachment factor A)	1q44					|HNRNPU|3192|Q00839;Q96BA7|heterogeneous nuclear ribonucleoprotein U isoform a [Homo sapiens]	320@C562,320@C594
NP_074035.1|,NP_001035202.1|,NP_001035203.1|,NP_002465.1|	27	4	2.14467	728	MYH11	myosin, heavy chain 11, smooth muscle	16p13.11	MYHII	1	1	2	|MYH11|4629|P35749;D2JYH7;Q3MIV8|myosin-11 isoform SM1A [Homo sapiens]	320@C678,320@C685	CIIPNHEK
NP_074035.1|			2.16718		MYH11	myosin, heavy chain 11, smooth muscle	16p13.11	MYHII				|MYH11|4629|P35749;Q3MIV8|myosin-11 isoform SM2A [Homo sapiens]	320@C678
NP_001035202.1|			2.15938		MYH11	myosin, heavy chain 11, smooth muscle	16p13.11	MYHII				|MYH11|4629|P35749;Q3MIV8|myosin-11 isoform SM2B [Homo sapiens]	320@C685
NP_001035203.1|			2.12228		MYH11	myosin, heavy chain 11, smooth muscle	16p13.11	MYHII				|MYH11|4629|P35749;Q3MIV8|myosin-11 isoform SM1B [Homo sapiens]	320@C685
NP_002465.1|			2.12982		MYH11	myosin, heavy chain 11, smooth muscle	16p13.11	MYHII				|MYH11|4629|P35749;D2JYH7;Q3MIV8|myosin-11 isoform SM1A [Homo sapiens]	320@C678
NP_998776.1|,NP_002626.1|,NP_005879.1|	534	3	16.3284	766	SLC25A3	solute carrier family 25 (mitochondrial carrier; phosphate carrier), member 3	12q23.1	SLC	1	1	2	|SLC25A3|5250|Q00325;Q6MZF9|phosphate carrier protein, mitochondrial isoform a precursor [Homo sapiens]	320@C236,320@C237	FACFER
NP_998776.1|			16.3435		SLC25A3	solute carrier family 25 (mitochondrial carrier; phosphate carrier), member 3	12q23.1	SLC				|SLC25A3|5250|Q00325;Q6MZF9|phosphate carrier protein, mitochondrial isoform b precursor [Homo sapiens]	320@C236
NP_002626.1|			16.3435		SLC25A3	solute carrier family 25 (mitochondrial carrier; phosphate carrier), member 3	12q23.1	SLC				|SLC25A3|5250|Q00325;Q6MZF9|phosphate carrier protein, mitochondrial isoform b precursor [Homo sapiens]	320@C236
NP_005879.1|			16.2983		SLC25A3	solute carrier family 25 (mitochondrial carrier; phosphate carrier), member 3	12q23.1	SLC				|SLC25A3|5250|Q00325;Q6MZF9|phosphate carrier protein, mitochondrial isoform a precursor [Homo sapiens]	320@C237
NP_005156.1|	371	1	9.89011	793	ALDOC	aldolase C, fructose-bisphosphate	17q11.2		1	1	2	|ALDOC|230|P09972|fructose-bisphosphate aldolase C [Homo sapiens]	320@C202	RCQYVTEK
XP_496322.6|	561	1	4.039	811	Unmapped_XP_496322.6|				2	2	2	|ZNF888|388559|-|PREDICTED: zinc finger protein 845 [Homo sapiens]	320@C552,320@C555,320@C53	RYKCNECGK,NLVSLDISSKCMMEFSSIGK
XXX_NP_001010906.1|	578	1		841	Unmapped_XXX_NP_001010906.1|				1	1	2			VGEQLPQEMCAFCQAIAK
NP_055542.1|,NP_005924.2|,NP_001184033.1|	579	3	0.29068	842	KMT2A	lysine (K)-specific methyltransferase 2A	11q23	KMT	1	1	2	|MLL|4297|Q03164;E9PQG7|histone-lysine N-methyltransferase MLL isoform 1 precursor [Homo sapiens]	320@C1249,320@C1479,320@C1252,320@C1482	RCKFCHVCGR
NP_055542.1|			0.368324		KMT2B	lysine (K)-specific methyltransferase 2B	19q13.1	KMT				|MLL4|9757|Q9UMN6|histone-lysine N-methyltransferase MLL4 [Homo sapiens]	320@C1249,320@C1252
NP_005924.2|			0.251953		KMT2A	lysine (K)-specific methyltransferase 2A	11q23	KMT				|MLL|4297|Q03164|histone-lysine N-methyltransferase MLL isoform 2 precursor [Homo sapiens]	320@C1479,320@C1482
NP_001184033.1|			0.251762		KMT2A	lysine (K)-specific methyltransferase 2A	11q23	KMT				|MLL|4297|Q03164;E9PQG7|histone-lysine N-methyltransferase MLL isoform 1 precursor [Homo sapiens]	320@C1479,320@C1482
NP_001967.3|,NP_443739.3|,NP_001180432.1|,NP_001966.1|	156	4	2.841	845	ENO2	enolase 2 (gamma, neuronal)	12p13		1	1	2	|ENO2|2026|P09104;Q6FHV6|gamma-enolase [Homo sapiens]	320@C399,320@C356	TGAPCR
NP_001967.3|			2.76498		ENO3	enolase 3 (beta, muscle)	17p13.2					|ENO3|2027|P13929;D3DTL2|beta-enolase isoform 1 [Homo sapiens]	320@C399
NP_443739.3|			2.76498		ENO3	enolase 3 (beta, muscle)	17p13.2					|ENO3|2027|P13929;D3DTL2|beta-enolase isoform 1 [Homo sapiens]	320@C399
NP_001180432.1|			3.06905		ENO3	enolase 3 (beta, muscle)	17p13.2					|ENO3|2027|P13929|beta-enolase isoform 2 [Homo sapiens]	320@C356
NP_001966.1|			2.76498		ENO2	enolase 2 (gamma, neuronal)	12p13					|ENO2|2026|P09104;Q6FHV6|gamma-enolase [Homo sapiens]	320@C399
NP_001896.2|	41	1	3.5533	53	CTPS1	CTP synthase 1	1p34.1		1	1	1	|CTPS1|1503|P17812|CTP synthase 1 [Homo sapiens]	320@C491	KCLEEQGLK
NP_000282.1|	52	1	36.211	65	PGK1	phosphoglycerate kinase 1	Xq13.3		1	1	1	|PGK1|5230|P00558;A8K4W6|phosphoglycerate kinase 1 [Homo sapiens]	320@C50	FCLDNGAK
NP_004716.1|,NP_001007794.1|	77	2	8.25696	95	BUB3	BUB3 mitotic checkpoint protein	10q24	WDR	1	1	1	|BUB3|9184|O43684|mitotic checkpoint protein BUB3 isoform b [Homo sapiens]	320@C270	LCQFHR
NP_004716.1|			8.23171		BUB3	BUB3 mitotic checkpoint protein	10q24	WDR				|BUB3|9184|O43684|mitotic checkpoint protein BUB3 isoform a [Homo sapiens]	320@C270
NP_001007794.1|			8.28221		BUB3	BUB3 mitotic checkpoint protein	10q24	WDR				|BUB3|9184|O43684|mitotic checkpoint protein BUB3 isoform b [Homo sapiens]	320@C270
NP_001022.1|	88	1	37.6812	109	RPS28	ribosomal protein S28	19p13.2	RPS	1	1	1	|RPS28|6234|P62857;B2R4R9|40S ribosomal protein S28 [Homo sapiens]	320@C27	TGSQGQCTQVR
NP_001000.2|	115	1	25	148	RPS5	ribosomal protein S5	19q13.4	RPS	1	1	1	|RPS5|6193|P46782|40S ribosomal protein S5 [Homo sapiens]	320@C66	AQCPIVER
NP_001006.1|	124	1	44.9367	158	RPS11	ribosomal protein S11	19q13.3	RPS	1	1	1	|RPS11|6205|P62280|40S ribosomal protein S11 [Homo sapiens]	320@C116	NMSVHLSPCFR
NP_004588.1|,NP_808210.2|	140	2	24.8274	177	SNRPD2	small nuclear ribonucleoprotein D2 polypeptide 16.5kDa	19q13.2-q13.3		1	1	1	|SNRPD2|6633|P62316|small nuclear ribonucleoprotein Sm D2 isoform 2 [Homo sapiens]	320@C63,320@C53	HCNMVLENVK
NP_004588.1|			23.7288		SNRPD2	small nuclear ribonucleoprotein D2 polypeptide 16.5kDa	19q13.2-q13.3					|SNRPD2|6633|P62316|small nuclear ribonucleoprotein Sm D2 isoform 1 [Homo sapiens]	320@C63
NP_808210.2|			25.9259		SNRPD2	small nuclear ribonucleoprotein D2 polypeptide 16.5kDa	19q13.2-q13.3					|SNRPD2|6633|P62316|small nuclear ribonucleoprotein Sm D2 isoform 2 [Homo sapiens]	320@C53
NP_006089.1|	157	1	17.9811	201	GNB2L1	guanine nucleotide binding protein (G protein), beta polypeptide 2-like 1	5q35.3	WDR	1	1	1	|GNB2L1|10399|P63244;E9KL35|guanine nucleotide-binding protein subunit beta-2-like 1 [Homo sapiens]	320@C182	VWNLANCK
NP_006576.2|	180	1	33.3942	234	CCT8	chaperonin containing TCP1, subunit 8 (theta)	21q21.3	CHAP	1	1	1	|CCT8|10694|P50990|T-complex protein 1 subunit theta [Homo sapiens]	320@C148	AHEILPNLVCCSAK
NP_001177931.1|	212	1	15.3846	277	GSTO1	glutathione S-transferase omega 1	10q25.1	SGST	1	1	1	|GSTO1|9446|F5H7H0|glutathione S-transferase omega-1 isoform 2 [Homo sapiens]	320@C32	FCPFAER
NP_004823.1|,NP_001177932.1|	212	2	24.7638	278	GSTO1	glutathione S-transferase omega 1	10q25.1	SGST	1	1	1	|GSTO1|9446|D3DRA3|glutathione S-transferase omega-1 isoform 3 [Homo sapiens]	320@C32,320@C4	FCPFAER
NP_004823.1|			23.2365		GSTO1	glutathione S-transferase omega 1	10q25.1	SGST				|GSTO1|9446|P78417|glutathione S-transferase omega-1 isoform 1 [Homo sapiens]	320@C32
NP_001177932.1|			26.2911		GSTO1	glutathione S-transferase omega 1	10q25.1	SGST				|GSTO1|9446|D3DRA3|glutathione S-transferase omega-1 isoform 3 [Homo sapiens]	320@C4
NP_001093.1|,NP_001123476.1|,NP_001123477.1|	247	3	20.2782	323	ACTN1	actinin, alpha 1	14q24.1	EFHAND	1	1	1	|ACTN1|87|P12814|alpha-actinin-1 isoform c [Homo sapiens]	320@C332	VQEKCQLEINFNTLQTK
NP_001093.1|			20.4036		ACTN1	actinin, alpha 1	14q24.1	EFHAND				|ACTN1|87|P12814|alpha-actinin-1 isoform b [Homo sapiens]	320@C332
NP_001123476.1|			19.9125		ACTN1	actinin, alpha 1	14q24.1	EFHAND				|ACTN1|87|P12814|alpha-actinin-1 isoform a [Homo sapiens]	320@C332
NP_001123477.1|			20.5186		ACTN1	actinin, alpha 1	14q24.1	EFHAND				|ACTN1|87|P12814|alpha-actinin-1 isoform c [Homo sapiens]	320@C332
NP_004915.2|	247	1	19.0999	324	ACTN4	actinin, alpha 4	19q13	EFHAND	1	1	1	|ACTN4|81|O43707|alpha-actinin-4 [Homo sapiens]	320@C351	VQEKCQLEINFNTLQTK
NP_000261.2|	268	1	12.1107	368	PNP	purine nucleoside phosphorylase	14q11.2		1	1	1	|PNP|4860|P00491|purine nucleoside phosphorylase [Homo sapiens]	320@C78	ACVMMQGR
NP_001011.1|	288	1	47.2603	398	RPS16	ribosomal protein S16	19q13.1	RPS	1	1	1	|RPS16|6217|P62249|40S ribosomal protein S16 [Homo sapiens]	320@C25	TATAVAHCK
NP_942127.1|,NP_001087.2|	295	2	5.1096	409	ACLY	ATP citrate lyase	17q21.2		1	1	1	|ACLY|47|P53396|ATP-citrate synthase isoform 1 [Homo sapiens]	320@C20	FICTTSAIQNR
NP_942127.1|			5.13291		ACLY	ATP citrate lyase	17q21.2					|ACLY|47|P53396|ATP-citrate synthase isoform 2 [Homo sapiens]	320@C20
NP_001087.2|			5.08629		ACLY	ATP citrate lyase	17q21.2					|ACLY|47|P53396|ATP-citrate synthase isoform 1 [Homo sapiens]	320@C20
NP_001094.1|	247	1	7.27069	424	ACTN2	actinin, alpha 2	1q42-q43	EFHAND	1	1	1	|ACTN2|88|P35609|alpha-actinin-2 [Homo sapiens]	320@C339	VQEKCQLEINFNTLQTK
NP_005023.2|,NP_001165806.1|,NP_001129497.1|	312	3	4.18858	429	PLS3	plastin 3	Xq23	EFHAND	1	1	1	|PLS3|5358|P13797;A8K579|plastin-3 isoform 1 [Homo sapiens]	320@C463,320@C436	KLENCNYAVELGK
NP_005023.2|			4.12698		PLS3	plastin 3	Xq23	EFHAND				|PLS3|5358|P13797;A8K579|plastin-3 isoform 1 [Homo sapiens]	320@C463
NP_001165806.1|			4.31177		PLS3	plastin 3	Xq23	EFHAND				|PLS3|5358|B4DPW9|plastin-3 isoform 2 [Homo sapiens]	320@C436
NP_001129497.1|			4.12698		PLS3	plastin 3	Xq23	EFHAND				|PLS3|5358|P13797;A8K579|plastin-3 isoform 1 [Homo sapiens]	320@C463
NP_665735.1|,NP_064696.1|,NP_665734.1|,NP_665707.1|,NP_001247440.1|,NP_001247441.1|,NP_001254527.1|	316	7	10.6373	433	MGST1	microsomal glutathione S-transferase 1	12p12.3-p12.1	MGST	1	1	1	|MGST1|4257|-|microsomal glutathione S-transferase 1 isoform c [Homo sapiens]	320@C50	KVFANPEDCVAFGK
NP_665735.1|			9.03226		MGST1	microsomal glutathione S-transferase 1	12p12.3-p12.1	MGST				|MGST1|4257|P10620|microsomal glutathione S-transferase 1 isoform a [Homo sapiens]	320@C50
NP_064696.1|			9.03226		MGST1	microsomal glutathione S-transferase 1	12p12.3-p12.1	MGST				|MGST1|4257|P10620|microsomal glutathione S-transferase 1 isoform a [Homo sapiens]	320@C50
NP_665734.1|			9.03226		MGST1	microsomal glutathione S-transferase 1	12p12.3-p12.1	MGST				|MGST1|4257|P10620|microsomal glutathione S-transferase 1 isoform a [Homo sapiens]	320@C50
NP_665707.1|			9.03226		MGST1	microsomal glutathione S-transferase 1	12p12.3-p12.1	MGST				|MGST1|4257|P10620|microsomal glutathione S-transferase 1 isoform a [Homo sapiens]	320@C50
NP_001247440.1|			9.03226		MGST1	microsomal glutathione S-transferase 1	12p12.3-p12.1	MGST				|MGST1|4257|P10620|microsomal glutathione S-transferase 1 isoform a [Homo sapiens]	320@C50
NP_001247441.1|			13.2075		MGST1	microsomal glutathione S-transferase 1	12p12.3-p12.1	MGST				|MGST1|4257|-|microsomal glutathione S-transferase 1 isoform b [Homo sapiens]	320@C50
NP_001254527.1|			16.092		MGST1	microsomal glutathione S-transferase 1	12p12.3-p12.1	MGST				|MGST1|4257|-|microsomal glutathione S-transferase 1 isoform c [Homo sapiens]	320@C50
NP_001158887.1|,NP_001158888.1|	100	2	44.8443	468	LDHA	lactate dehydrogenase A	11p15.1		1	1	1	|LDHA|3939|P00338|L-lactate dehydrogenase A chain isoform 5 [Homo sapiens]	320@C131	YSPNCK
NP_001158887.1|			41.9708		LDHA	lactate dehydrogenase A	11p15.1					|LDHA|3939|P00338|L-lactate dehydrogenase A chain isoform 4 [Homo sapiens]	320@C131
NP_001158888.1|			47.7178		LDHA	lactate dehydrogenase A	11p15.1					|LDHA|3939|P00338|L-lactate dehydrogenase A chain isoform 5 [Homo sapiens]	320@C131
NP_005557.1|,NP_001158886.1|	100	2	38.7403	469	LDHA	lactate dehydrogenase A	11p15.1		1	1	1	|LDHA|3939|P00338|L-lactate dehydrogenase A chain isoform 3 [Homo sapiens]	320@C131,320@C160	YSPNCK
NP_005557.1|			40.3614		LDHA	lactate dehydrogenase A	11p15.1					|LDHA|3939|P00338|L-lactate dehydrogenase A chain isoform 1 [Homo sapiens]	320@C131
NP_001158886.1|			37.1191		LDHA	lactate dehydrogenase A	11p15.1					|LDHA|3939|P00338|L-lactate dehydrogenase A chain isoform 3 [Homo sapiens]	320@C160
NP_002442.2|	347	1	20.4947	479	MTAP	methylthioadenosine phosphorylase	9p21		1	1	1	|MTAP|4507|Q13126|S-methyl-5'-thioadenosine phosphorylase [Homo sapiens]	320@C136	GVCHIPMAEPFCPK
NP_002406.1|	377	1	17.3913	522	MIF	macrophage migration inhibitory factor (glycosylation-inhibiting factor)	22q11.23		1	1	1	|MIF|4282|P14174|macrophage migration inhibitory factor [Homo sapiens]	320@C81	LLCGLLAER
NP_000981.1|	397	1	20.2703	554	RPL27A	ribosomal protein L27a	11p15	RPL	1	1	1	|RPL27A|6157|P46776|60S ribosomal protein L27a [Homo sapiens]	320@C70	NQSFCPTVNLDK
NP_733765.1|	429	1	3.45489	598	ATP2A2	ATPase, Ca++ transporting, cardiac muscle, slow twitch 2	12q24.11	PATP	1	1	1	|ATP2A2|488|P16615|sarcoplasmic/endoplasmic reticulum calcium ATPase 2 isoform b [Homo sapiens]	320@C997	NYLEPGKECVQPATK
NP_788955.1|,NP_006254.1|	479	2	7.61526	667	PSME1	proteasome (prosome, macropain) activator subunit 1 (PA28 alpha)	14q11.2	PSM	1	1	1	|PSME1|5720|Q06323;Q6IBM2|proteasome activator complex subunit 1 isoform 1 [Homo sapiens]	320@C22	VDVFREDLCTK
NP_788955.1|			7.6		PSME1	proteasome (prosome, macropain) activator subunit 1 (PA28 alpha)	14q11.2	PSM				|PSME1|5720|Q06323;A6NJG9;Q86SZ9|proteasome activator complex subunit 1 isoform 2 [Homo sapiens]	320@C22
NP_006254.1|			7.63052		PSME1	proteasome (prosome, macropain) activator subunit 1 (PA28 alpha)	14q11.2	PSM				|PSME1|5720|Q06323;Q6IBM2|proteasome activator complex subunit 1 isoform 1 [Homo sapiens]	320@C22
NP_003421.2|	449	1	4.03023	683	ZNF91	zinc finger protein 91	19p12	ZNF	1	1	1	|ZNF91|7644|Q05481|zinc finger protein 91 [Homo sapiens]	320@C408,320@C576,320@C716,320@C856,320@C411,320@C579,320@C719,320@C859	KLYKCEECGK
NP_036525.1|	499	1	1.49477	700	PFAS	phosphoribosylformylglycinamidine synthase	17p13.1		1	1	1	|PFAS|5198|O15067;A8K9T9;Q6P4B4|phosphoribosylformylglycinamidine synthase [Homo sapiens]	320@C606	IVLVDDRECPVR
NP_008835.5|,NP_001075109.1|	545	2	0.899709	778	PRKDC	protein kinase, DNA-activated, catalytic polypeptide	8q11		1	1	1	|PRKDC|5591|P78527|DNA-dependent protein kinase catalytic subunit isoform 2 [Homo sapiens]	320@C3837,320@C3806	APPCEYKDWLTK
NP_008835.5|			0.896318		PRKDC	protein kinase, DNA-activated, catalytic polypeptide	8q11					|PRKDC|5591|P78527|DNA-dependent protein kinase catalytic subunit isoform 1 [Homo sapiens]	320@C3837
NP_001075109.1|			0.9031		PRKDC	protein kinase, DNA-activated, catalytic polypeptide	8q11					|PRKDC|5591|P78527|DNA-dependent protein kinase catalytic subunit isoform 2 [Homo sapiens]	320@C3806
NP_002289.2|	312	1	28.3892	791	LCP1	lymphocyte cytosolic protein 1 (L-plastin)	13q14.3	EFHAND	1	1	1	|LCP1|3936|P13796|plastin-2 [Homo sapiens]	320@C460	KLENCNYAVELGK
NP_006363.4|,NP_001153148.1|,NP_001153147.1|,NP_001153146.1|,NP_001153149.1|	297	5	2.98018	829	SYNCRIP	synaptotagmin binding, cytoplasmic RNA interacting protein	6q14-q15	RBM	1	1	1	|SYNCRIP|10492|O60506;Q59GL1|heterogeneous nuclear ribonucleoprotein Q isoform 6 [Homo sapiens]	320@C96	SAFLCGVMK
NP_006363.4|			2.72873		SYNCRIP	synaptotagmin binding, cytoplasmic RNA interacting protein	6q14-q15	RBM				|SYNCRIP|10492|O60506|heterogeneous nuclear ribonucleoprotein Q isoform 1 [Homo sapiens]	320@C96
NP_001153148.1|			3.0303		SYNCRIP	synaptotagmin binding, cytoplasmic RNA interacting protein	6q14-q15	RBM				|SYNCRIP|10492|O60506;Q59GL1|heterogeneous nuclear ribonucleoprotein Q isoform 5 [Homo sapiens]	320@C96
NP_001153147.1|			2.89116		SYNCRIP	synaptotagmin binding, cytoplasmic RNA interacting protein	6q14-q15	RBM				|SYNCRIP|10492|O60506|heterogeneous nuclear ribonucleoprotein Q isoform 4 [Homo sapiens]	320@C96
NP_001153146.1|			3.22581		SYNCRIP	synaptotagmin binding, cytoplasmic RNA interacting protein	6q14-q15	RBM				|SYNCRIP|10492|O60506;Q59GL1|heterogeneous nuclear ribonucleoprotein Q isoform 3 [Homo sapiens]	320@C96
NP_001153149.1|			3.02491		SYNCRIP	synaptotagmin binding, cytoplasmic RNA interacting protein	6q14-q15	RBM				|SYNCRIP|10492|O60506;Q59GL1|heterogeneous nuclear ribonucleoprotein Q isoform 6 [Homo sapiens]	320@C96
NP_005817.1|	297	1	13.2701	830	HNRNPR	heterogeneous nuclear ribonucleoprotein R	1p36.12	RBM	1	1	1	|HNRNPR|10236|O43390|heterogeneous nuclear ribonucleoprotein R isoform 2 [Homo sapiens]	320@C99	SAFLCGVMK
NP_001095868.1|	297	1	10.5346	831	HNRNPR	heterogeneous nuclear ribonucleoprotein R	1p36.12	RBM	1	1	1	|HNRNPR|10236|O43390|heterogeneous nuclear ribonucleoprotein R isoform 1 [Homo sapiens]	320@C99	SAFLCGVMK
NP_004955.2|	588	1	4.35685	857	HDAC1	histone deacetylase 1	1p34		1	1	1	|HDAC1|3065|Q13547;Q6IT96|histone deacetylase 1 [Homo sapiens]	320@C408	ISICSSDKR
